# Supplementary material for: Divergent evolutionary rates in vertebrate and mammalian specific conserved non-coding elements (CNEs) in echolocating mammals
Source: PubMed Central journal article supplement (PMC4302572; doi:10.1186/s12862-014-0261-5), 2014-12-19
Supplement: 12862_2014_261_MOESM1_ESM.pdf [file 12862_2014_261_MOESM1_ESM.pdf]

**Additional file 1: Divergent evolutionary rates in vertebrate and mammalian specific Conserved Non-coding Elements (CNEs) in echolocating mammals**

**Table S1.**

**(a) Species information and sequence coverage of the 3,110 vertebrate specific CNEs included in this study.** Species denoted by \* were found to contain >10% missing data of vertebrate CNEs and were excluded from initial vertebrate-specific CNE analyses.

Data sources and associated references: Ensembl [1]; CONDOR database [2]; GenBank bat genome assembly numbers [3].

| Superorder     | Order           | Family            | Species                          | Common name                | % missing data | Data source:  |
|----------------|-----------------|-------------------|----------------------------------|----------------------------|----------------|---------------|
|                | Monotremata     | Ornithorhynchidae | <i>Ornithorhynchus anatinus</i>  | Platypus                   | 6              | Ensembl [1]   |
| Marsupialia    | Didelphimorphia | Didelphidae       | <i>Monodelphis domestica</i>     | Grey short-tailed opossum  | 4              | Ensembl [1]   |
|                |                 | Macropodidae      | <i>Macropus eugenii</i> *        | Wallaby                    | 18             | Ensembl [1]   |
|                | Dasyuromorphia  | Dasyuridae        | <i>Sarcophilus harrisii</i>      | Tasmanian devil            | 3              | Ensembl [1]   |
| Xenarthra      | Cingulata       | Dasypodidae       | <i>Dasypus novemcinctus</i> *    | Nine-banded armadillo      | 19             | Ensembl [1]   |
| Afrotheria     | Pilosa          | Megalonychidae    | <i>Choloepus hoffmanni</i> *     | Two-toed sloth             | 19             | Ensembl [1]   |
|                | Proboscidea     | Elephantidae      | <i>Loxodonta africana</i>        | African elephant           | 1              | Ensembl [1]   |
|                | Afrosoricida    | Tenrecidae        | <i>Echinops telfairi</i> *       | Madagascan hedgehog tenrec | 16             | Ensembl [1]   |
|                | Hyracoidea      | Procaviidae       | <i>Procavia capensis</i> *       | Rock Hyrax                 | 14             | Ensembl [1]   |
| Laurasiatheria | Erinaceomorpha  | Erinaceidae       | <i>Erinaceus europaeus</i> *     | European hedgehog          | 18             | Ensembl [1]   |
|                | Soricomorpha    | Soricidae         | <i>Sorex araneus</i> *           | European shrew             | 20             | Ensembl [1]   |
|                | Chiroptera      | Pteropodidae      | <i>Pteropus vampyrus</i>         | Large flying fox           | 7              | Ensembl [1]   |
|                |                 |                   | <i>Eidolon helvum</i>            | Straw coloured fruit bat   | 3              | ASM46528v1[3] |
|                |                 | Rhinolophidae     | <i>Rhinolophus ferrumequinum</i> | Greater horseshoe bat      | 1              | ASM46549v1[3] |
|                |                 | Megadermatidae    | <i>Megaderma lyra</i>            | Greater false vampire bat  | 10             | ASM46534v1[3] |
|                |                 | Mormoopidae       | <i>Pteronotus parnellii</i>      | Parnell's moustached bat   | 5              | ASM46540v1[3] |
|                |                 | Vespertilionidae  | <i>Myotis lucifugus</i>          | Little brown bat           | 5              | Ensembl [1]   |
|                | Cetartiodactyla | Camelidae         | <i>Vicugna pacos</i> *           | Alpaca                     | 16             | Ensembl [1]   |
|                |                 | Bovidae           | <i>Bos taurus</i>                | Cow                        | 2              | Ensembl [1]   |
|                |                 |                   | <i>Ovis aries</i> *              | Sheep                      | 14             | Ensembl [1]   |

|                  |                |                 |                                     |                                |    |             |
|------------------|----------------|-----------------|-------------------------------------|--------------------------------|----|-------------|
|                  |                | Suidae          | <i>Sus scrofa</i> *                 | Pig                            | 15 | Ensembl [1] |
|                  | Cetacea        | Delphinidae     | <i>Tursiops truncatus</i>           | Bottlenose dolphin             | 4  | Ensembl [1] |
|                  | Carnivora      | Ursidae         | <i>Ailuropoda melanoleuca</i>       | Panda                          | <1 | Ensembl [1] |
|                  |                | Felidae         | <i>Felis catus</i> *                | Cat                            | 25 | Ensembl [1] |
|                  |                | Canidae         | <i>Canis familiaris</i>             | Dog                            | 1  | Ensembl [1] |
|                  | Perissodactyla | Equidae         | <i>Equus caballus</i>               | Horse                          | 1  | Ensembl [1] |
| Euarchontoglires | Scandentia     | Tupauidae       | <i>Tupaia belangeri</i> *           | Northern treeshrew             | 13 | Ensembl [1] |
|                  | Primata        | Hominidae       | <i>Gorilla gorilla</i>              | Gorilla                        | 3  | Ensembl [1] |
|                  |                |                 | <i>Homo sapiens</i>                 | Human                          | 0  | CONDOR [2]  |
|                  |                |                 | <i>Pan troglodytes</i>              | Chimpanzee                     | <1 | Ensembl [1] |
|                  |                |                 | <i>Pongo abelii</i>                 | Sumatran orangutan             | 1  | Ensembl [1] |
|                  |                | Hylobatidae     | <i>Nomascus leucogenys</i>          | Northern white-cheeked gibbon  | <1 | Ensembl [1] |
|                  |                | Cercopithecidae | <i>Macaca mulatta</i>               | Rhesus macaque                 | <1 | Ensembl [1] |
|                  |                |                 | <i>Papio hamadryas</i>              | Hamadryas baboon               | <1 | Ensembl [1] |
|                  |                | Cebidae         | <i>Callithrix jacchus</i>           | Marmoset                       | <1 | Ensembl [1] |
|                  |                | Galagidae       | <i>Otolemur garnettii</i> *         | Greater galago                 | 13 | Ensembl [1] |
|                  |                | Cheirogaleidae  | <i>Microcebus murinus</i> *         | Mouse lemur                    | 11 | Ensembl [1] |
|                  |                | Tarsiidae       | <i>Tarsius syrichta</i> *           | Tarsier                        | 11 | Ensembl [1] |
|                  | Lagomorpha     | Leporidae       | <i>Oryctolagus cuniculus</i>        | Rabbit                         | 3  | Ensembl [1] |
|                  |                | Ochotonidae     | <i>Ochotona princeps</i> *          | Pika                           | 12 | Ensembl [1] |
|                  | Rodentia       | Muridae         | <i>Mus musculus</i>                 | Mouse                          | 2  | CONDOR [2]  |
|                  |                |                 | <i>Rattus norvegicus</i> *          | Rat                            | 16 | CONDOR [2]  |
|                  |                | Heteromyidae    | <i>Dipodomys ordii</i> *            | Kangaroo rat                   | 12 | Ensembl [1] |
|                  |                | Sciuridae       | <i>Ictidomys tridecemlineatus</i> * | Thirteen-lined ground squirrel | 19 | Ensembl [1] |
|                  |                | Caviidae        | <i>Cavia porcellus</i>              | Guinea pig                     | 2  | Ensembl [1] |

**(b) Species information for taxa included in wider sampling of CNEs from the Hmx2/3 genomic region.**

Data sources and associated references: Ensembl [1]; CONDOR database [2]; GenBank genome assembly numbers [3-6].

\* Provided by Wesley Warren and The Genome Institute, Washington University School of Medicine.

| Superorder       | Order           | Family            | Species                           | Common name               | Data source:                  |
|------------------|-----------------|-------------------|-----------------------------------|---------------------------|-------------------------------|
|                  | Monotremata     | Ornithorhynchidae | <i>Ornithorhynchus anatinus</i>   | Platypus                  | Ensembl [1]                   |
| Marsupialia      | Didelphimorphia | Didelphidae       | <i>Monodelphis domestica</i>      | Grey short-tailed opossum | Ensembl [1]                   |
|                  | Dasyuromorphia  | Dasyuridae        | <i>Sarcophilus harrisii</i>       | Tasmanian devil           | Ensembl [1]                   |
| Afrotheria       | Proboscidea     | Elephantidae      | <i>Loxodonta africana</i>         | African elephant          | Ensembl [1]                   |
| Laurasiatheria   | Erinaceomorpha  | Erinaceidae       | <i>Erinaceus europaeus</i>        | European hedgehog         | Ensembl [1]                   |
|                  | Soricomorpha    | Soricidae         | <i>Sorex araneus</i>              | European shrew            | Ensembl [1]                   |
|                  | Chiroptera      | Pteropodidae      | <i>Pteropus vampyrus</i>          | Large flying fox          | Ensembl [1]                   |
|                  |                 |                   | <i>Pteropus alecto</i>            | Black flying fox          | ASM32557v1 [4]                |
|                  |                 |                   | <i>Eidolon helvum</i>             | Straw coloured fruit bat  | ASM46528v1 [3]                |
|                  |                 | Rhinolophidae     | <i>Rhinolophus ferrumequinum</i>  | Greater horseshoe bat     | ASM46549v1 [3]                |
|                  |                 | Megadermatidae    | <i>Megaderma lyra</i>             | Greater false vampire bat | ASM46534v1 [3]                |
|                  |                 | Mormoopidae       | <i>Pteronotus parnellii</i>       | Parnell's moustached bat  | ASM46540v1 [3]                |
|                  |                 | Vespertilionidae  | <i>Myotis lucifugus</i>           | Little brown bat          | Ensembl [1]                   |
|                  |                 |                   | <i>Myotis davidii</i>             | David's Myotis            | ASM32557v1 [4]                |
|                  |                 |                   | <i>Eptesicus fuscus</i>           | Big brown bat             | EptFus1.0                     |
|                  | Cetartiodactyla | Bovidae           | <i>Bos taurus</i>                 | Cow                       | Ensembl [1]                   |
|                  | Cetacea         | Balaenopteridae   | <i>Balaenoptera acutorostrata</i> | Minke whale               | BalAcu1.0 [5]                 |
|                  |                 | Delphinidae       | <i>Tursiops truncatus</i>         | Bottlenose dolphin        | Ensembl [1]                   |
|                  |                 |                   | <i>Orcinus orca</i>               | Killer whale              | Oorc_1.1                      |
|                  |                 | Physeteridae      | <i>Physeter catodon</i>           | Sperm whale               | Physeter_macrocephalus-2.0.2* |
|                  |                 | Lipotidae         | <i>Lipotes vexillifer</i>         | River dolphin             | Lipotes_vexillifer_v1 [6]     |
|                  | Carnivora       | Ursidae           | <i>Ailuropoda melanoleuca</i>     | Panda                     | Ensembl [1]                   |
|                  |                 | Canidae           | <i>Canis familiaris</i>           | Dog                       | Ensembl [1]                   |
|                  | Perissodactyla  | Equidae           | <i>Equus caballus</i>             | Horse                     | Ensembl [1]                   |
| Euarchontoglires | Primata         | Hominidae         | <i>Gorilla gorilla</i>            | Gorilla                   | Ensembl [1]                   |

|  |            |                 |                              |                               |             |
|--|------------|-----------------|------------------------------|-------------------------------|-------------|
|  |            |                 | <i>Homo sapiens</i>          | Human                         | CONDOR [2]  |
|  |            |                 | <i>Pan troglodytes</i>       | Chimpanzee                    | Ensembl [1] |
|  |            |                 | <i>Pongo abelii</i>          | Sumatran orangutan            | Ensembl [1] |
|  |            | Hylobatidae     | <i>Nomascus leucogenys</i>   | Northern white-cheeked gibbon | Ensembl [1] |
|  |            | Cercopithecidae | <i>Macaca mulatta</i>        | Rhesus macaque                | Ensembl [1] |
|  |            |                 | <i>Papio hamadryas</i>       | Hamadryas baboon              | Ensembl [1] |
|  |            | Cebidae         | <i>Callithrix jacchus</i>    | Marmoset                      | Ensembl [1] |
|  | Lagomorpha | Leporidae       | <i>Oryctolagus cuniculus</i> | Rabbit                        | Ensembl [1] |
|  | Rodentia   | Muridae         | <i>Mus musculus</i>          | Mouse                         | CONDOR [2]  |
|  |            | Caviidae        | <i>Cavia porcellus</i>       | Guinea pig                    | Ensembl [1] |

**(c) Species representation and sources used for the mammalian specific CNE study.**

Data sources and associated references: Ensembl [1]; UCSC genome browser: [<http://genome.ucsc.edu/>] [7]; GenBank genome assembly numbers [3-5].

| Superorder       | Order           | Family           | Species                           | Common name               | Number of CNEs | Data:          |
|------------------|-----------------|------------------|-----------------------------------|---------------------------|----------------|----------------|
| Laurasiatheria   | Erinaceomorpha  | Erinaceidae      | <i>Erinaceus europaeus</i>        | European hedgehog         | 52,201         | Ensembl [1]    |
|                  | Soricomorpha    | Soricidae        | <i>Sorex araneus</i>              | European shrew            | 49,554         | Ensembl [1]    |
|                  | Chiroptera      | Pteropodidae     | <i>Pteropus vampyrus</i>          | Large flying fox          | 74,119         | Ensembl [1]    |
|                  |                 |                  | <i>Pteropus alecto</i>            | Black flying fox          | 78,665         | ASM32557v1 [4] |
|                  |                 |                  | <i>Eidolon helvum</i>             | Straw coloured fruit bat  | 77,923         | ASM46528v1 [3] |
|                  |                 | Rhinolophidae    | <i>Rhinolophus ferrumequinum</i>  | Greater horseshoe bat     | 79,525         | ASM46549v1 [3] |
|                  |                 | Megadermatidae   | <i>Megaderma lyra</i>             | Greater false vampire bat | 71,534         | ASM46534v1 [3] |
|                  |                 | Mormoopidae      | <i>Pteronotus parnellii</i>       | Parnell's moustached bat  | 74,876         | ASM46540v1 [3] |
|                  |                 | Vespertilionidae | <i>Myotis lucifugus</i>           | Little brown bat          | 72,321         | Ensembl [1]    |
|                  |                 |                  | <i>Myotis davidii</i>             | David's Myotis            | 72,628         | ASM32557v1 [4] |
|                  |                 |                  | <i>Eptesicus fuscus</i>           | Big brown bat             | 73,265         | EptFus1.0      |
|                  | Cetartiodactyla | Bovidae          | <i>Bos taurus</i>                 | Cow                       | 78,564         | Ensembl [1]    |
|                  | Cetacea         | Delphinidae      | <i>Tursiops truncatus</i>         | Bottlenose dolphin        | 70,070         | Ensembl [1]    |
|                  |                 | Balaenopteridae  | <i>Balaenoptera acutorostrata</i> | Minke whale               | 80,440         | BalAcu1.0 [5]  |
|                  | Carnivora       | Ursidae          | <i>Ailuropoda melanoleuca</i>     | Panda                     | 81,356         | Ensembl [1]    |
|                  |                 | Canidae          | <i>Canis familiaris</i>           | Dog                       | 81,658         | Ensembl [1]    |
|                  | Perissodactyla  | Equidae          | <i>Equus caballus</i>             | Horse                     | 80,531         | Ensembl [1]    |
| Euarchontoglires | Primata         | Hominidae        | <i>Homo sapiens</i>               | Human                     | 82,335         | hg17 [7]       |
|                  | Rodentia        | Muridae          | <i>Mus musculus</i>               | Mouse                     | 79,227         | Ensembl [1]    |
|                  |                 | Caviidae         | <i>Cavia porcellus</i>            | Guinea pig                | 72,820         | Ensembl [1]    |

**Table S2.**

**Results of Tajima's relative rates test across all concatenated CNEs.** Substitution rates in each focal taxon were compared to the substitution rate of the horse (*E. caballus*), with reference to the human sequence. Statistics given include the uncorrected raw *P*-values, and these corrected for the multiple comparisons made across taxa by the FDR and Holm correction. Abbreviations: FDR – false discovery rate, d.f. – degrees of freedom.

| Focal species:          | Sites in sequences: |           | Unique differences: |                    |                   | $X^2$ (1 d.f.) | <i>P</i> -value                                                  |
|-------------------------|---------------------|-----------|---------------------|--------------------|-------------------|----------------|------------------------------------------------------------------|
|                         | Identical           | Divergent | Focal species       | <i>E. caballus</i> | <i>H. sapiens</i> |                | Raw (FDR, Holm)                                                  |
| <i>A. melanoleuca</i>   | 537,945             | 355       | 5191                | 4933               | 5875              | 6.57           | 0.010 (0.011, 0.021)                                             |
| <i>C. familiaris</i>    | 530,198             | 335       | 4594                | 4837               | 5783              | 6.26           | 0.012 (0.012, 0.021)                                             |
| <i>B. taurus</i>        | 524,419             | 364       | 6266                | 4703               | 5595              | 222.72         | <1x10 <sup>-5</sup> (1.3x10 <sup>-5</sup> , 1x10 <sup>-4</sup> ) |
| <i>T. truncatus</i>     | 502,412             | 370       | 7016                | 4579               | 5474              | 512.20         | <1x10 <sup>-5</sup> (1.3x10 <sup>-5</sup> , 1x10 <sup>-4</sup> ) |
| <i>E. helvum</i>        | 514,758             | 338       | 6825                | 4520               | 5251              | 468.31         | <1x10 <sup>-5</sup> (1.3x10 <sup>-5</sup> , 1x10 <sup>-4</sup> ) |
| <i>P. vampyrus</i>      | 485,450             | 304       | 6748                | 4311               | 4981              | 537.03         | <1x10 <sup>-5</sup> (1.3x10 <sup>-5</sup> , 1x10 <sup>-4</sup> ) |
| <i>R. ferrumequinum</i> | 530,780             | 397       | 6568                | 4763               | 5742              | 287.53         | <1x10 <sup>-5</sup> (1.3x10 <sup>-5</sup> , 1x10 <sup>-4</sup> ) |
| <i>M. lyra</i>          | 470,970             | 378       | 8095                | 4030               | 4752              | 1362.82        | <1x10 <sup>-5</sup> (1.3x10 <sup>-5</sup> , 1x10 <sup>-4</sup> ) |
| <i>M. lucifugus</i>     | 502,675             | 437       | 9519                | 4325               | 5219              | 1948.69        | <1x10 <sup>-5</sup> (1.3x10 <sup>-5</sup> , 1x10 <sup>-4</sup> ) |
| <i>P. parnellii</i>     | 498,446             | 382       | 7537                | 4411               | 5081              | 817.87         | <1x10 <sup>-5</sup> (1.3x10 <sup>-5</sup> , 1x10 <sup>-4</sup> ) |

**Table S3.**

**Results of Tajima's Relative Rates Test used to test lineage specific substitution rates in CNEs from echolocating and non-echolocating Laurasiatheria species.** Substitution rates in each focal taxon were compared to the substitution rate of the horse, with reference to the human sequence. In total 46 concatenated CNE alignments were tested, with each alignment corresponding to the corresponding CNEs from genomic regions containing at least one of the 49 identified ear development genes. Statistics given include the uncorrected raw *P*-values, and these corrected for the multiple comparisons made across loci by the FDR and Holm correction. Abbreviations: = – identical; ≠ – different; FDR – false discovery rate; FT – focal taxon; d.f. – degrees of freedom.

| Genomic region:         | #Sites: |   | #Unique differences: |       |       | $X^2$<br>(1 d.f.) | <i>P</i> -values<br>Uncorr. (FDR, Holm) |
|-------------------------|---------|---|----------------------|-------|-------|-------------------|-----------------------------------------|
|                         | =       | ≠ | FT                   | Horse | Human |                   |                                         |
| <i>ATBF1</i>            |         |   |                      |       |       |                   |                                         |
| Panda                   | 3858    | 4 | 25                   | 29    | 50    | 0.30              | 0.586 (0.773, 1.000)                    |
| Dog                     | 3865    | 3 | 28                   | 29    | 53    | 0.02              | 0.895 (0.895, 1.000)                    |
| Cow                     | 3806    | 0 | 43                   | 30    | 60    | 2.32              | 0.128 (0.320, 0.896)                    |
| Dolphin                 | 3628    | 2 | 53                   | 31    | 50    | 5.76              | 0.016 (0.120, 0.160)                    |
| <i>E. helvum</i>        | 3914    | 2 | 38                   | 34    | 52    | 0.22              | 0.637 (0.773, 1.000)                    |
| <i>P. vampyrus</i>      | 3195    | 1 | 38                   | 25    | 45    | 2.68              | 0.101 (0.320, 0.808)                    |
| <i>R. ferrumequinum</i> | 3869    | 2 | 39                   | 30    | 54    | 1.17              | 0.279 (0.528, 1.000)                    |
| <i>M. lyra</i>          | 3661    | 2 | 31                   | 28    | 52    | 0.15              | 0.696 (0.773, 1.000)                    |
| <i>M. lucifugus</i>     | 3932    | 2 | 49                   | 29    | 58    | 5.13              | 0.024 (0.120, 0.216)                    |
| <i>P. parnellii</i>     | 3968    | 2 | 36                   | 28    | 63    | 1.00              | 0.317 (0.528, 1.000)                    |
| <i>BARHL2</i>           |         |   |                      |       |       |                   |                                         |
| Panda                   | 9770    | 1 | 72                   | 78    | 107   | 0.24              | 0.624 (0.624, 1.000)                    |
| Dog                     | 9780    | 2 | 64                   | 82    | 110   | 2.22              | 0.136 (0.227, 0.680)                    |
| Cow                     | 8946    | 4 | 93                   | 72    | 85    | 2.67              | 0.102 (0.204, 0.612)                    |
| Dolphin                 | 8979    | 6 | 111                  | 74    | 92    | 7.40              | 0.007 (0.018, 0.050)                    |
| <i>E. helvum</i>        | 9701    | 3 | 69                   | 86    | 99    | 1.86              | 0.172 (0.246, 0.688)                    |
| <i>P. vampyrus</i>      | 9726    | 3 | 77                   | 86    | 96    | 0.50              | 0.481 (0.601, 1.000)                    |
| <i>R. ferrumequinum</i> | 9623    | 4 | 91                   | 84    | 103   | 0.28              | 0.597 (0.624, 1.000)                    |
| <i>M. lyra</i>          | 9244    | 3 | 137                  | 82    | 92    | 13.81             | $2 \times 10^{-4}$ (0.001, 0.002)       |
| <i>M. lucifugus</i>     | 9399    | 7 | 141                  | 77    | 99    | 18.79             | $1 \times 10^{-5}$ (0.000, 0.000)       |
| <i>P. parnellii</i>     | 9407    | 7 | 121                  | 82    | 92    | 7.49              | 0.006 (0.018, 0.050)                    |
| <i>BCL11A</i>           |         |   |                      |       |       |                   |                                         |
| Panda                   | 8472    | 1 | 35                   | 23    | 43    | 2.48              | 0.115 (0.128, 0.330)                    |
| Dog                     | 8421    | 3 | 23                   | 23    | 41    | 0.00              | 1.000 (1.000, 1.000)                    |
| Cow                     | 8335    | 0 | 36                   | 22    | 44    | 3.38              | 0.066 (0.095, 0.330)                    |
| Dolphin                 | 7920    | 3 | 66                   | 24    | 38    | 19.60             | $1 \times 10^{-5}$ (0.000, 0.000)       |
| <i>E. helvum</i>        | 8177    | 1 | 44                   | 23    | 42    | 6.58              | 0.010 (0.020, 0.060)                    |
| <i>P. vampyrus</i>      | 7791    | 0 | 60                   | 23    | 39    | 16.49             | $5 \times 10^{-5}$ (0.000, 0.000)       |
| <i>R. ferrumequinum</i> | 8338    | 1 | 39                   | 25    | 41    | 3.06              | 0.080 (0.100, 0.330)                    |
| <i>M. lyra</i>          | 7865    | 1 | 51                   | 24    | 41    | 9.72              | 0.002 (0.005, 0.013)                    |
| <i>M. lucifugus</i>     | 8354    | 0 | 80                   | 25    | 42    | 28.81             | $< 1 \times 10^{-5}$ (0.000, 0.000)     |
| <i>P. parnellii</i>     | 8306    | 1 | 41                   | 26    | 40    | 3.36              | 0.067 (0.095, 0.330)                    |
| <i>BCL11B</i>           |         |   |                      |       |       |                   |                                         |
| Panda                   | 1571    | 1 | 4                    | 4     | 15    | 0.00              | 1.000 (1.000, 1.000)                    |
| Dog                     | 1563    | 1 | 5                    | 4     | 14    | 0.11              | 0.739 (0.821, 1.000)                    |
| Cow                     | 1439    | 1 | 12                   | 4     | 12    | 4.00              | 0.046 (0.230, 0.460)                    |
| Dolphin                 | 1557    | 1 | 13                   | 6     | 12    | 2.58              | 0.108 (0.270, 0.756)                    |

|                         |      |   |    |    |    |       |                                    |
|-------------------------|------|---|----|----|----|-------|------------------------------------|
| <i>E. helvum</i>        | 1574 | 1 | 4  | 5  | 14 | 0.11  | 0.739 (0.821, 1.000)               |
| <i>P. vampyrus</i>      | 1477 | 1 | 3  | 5  | 7  | 0.50  | 0.480 (0.686, 1.000)               |
| <i>R. ferrumequinum</i> | 1563 | 1 | 12 | 4  | 15 | 4.00  | 0.046 (0.230, 0.460)               |
| <i>M. lyra</i>          | 1222 | 1 | 5  | 3  | 9  | 0.50  | 0.480 (0.686, 1.000)               |
| <i>M. lucifugus</i>     | 1555 | 2 | 14 | 6  | 12 | 3.20  | 0.074 (0.247, 0.592)               |
| <i>P. parnellii</i>     | 1539 | 1 | 9  | 5  | 14 | 1.14  | 0.285 (0.570, 1.000)               |
| <i>BHLHB5</i>           |      |   |    |    |    |       |                                    |
| Panda                   | 4766 | 2 | 47 | 34 | 56 | 2.09  | 0.149 (0.166, 0.366)               |
| Dog                     | 4760 | 1 | 28 | 32 | 59 | 0.27  | 0.606 (0.606, 0.606)               |
| Cow                     | 4715 | 2 | 86 | 34 | 55 | 22.53 | <1x10 <sup>-5</sup> (0.000, 0.000) |
| Dolphin                 | 4433 | 2 | 71 | 31 | 44 | 15.69 | 7x10 <sup>-5</sup> (0.000, 0.001)  |
| <i>E. helvum</i>        | 4794 | 5 | 48 | 34 | 56 | 2.39  | 0.122 (0.153, 0.366)               |
| <i>P. vampyrus</i>      | 4452 | 4 | 42 | 27 | 51 | 3.26  | 0.071 (0.101, 0.284)               |
| <i>R. ferrumequinum</i> | 4772 | 4 | 57 | 33 | 55 | 6.40  | 0.011 (0.018, 0.055)               |
| <i>M. lyra</i>          | 4758 | 7 | 73 | 33 | 55 | 15.09 | 1x10 <sup>-4</sup> (0.000, 0.001)  |
| <i>M. lucifugus</i>     | 4749 | 3 | 66 | 36 | 53 | 8.82  | 0.003 (0.006, 0.017)               |
| <i>P. parnellii</i>     | 4667 | 6 | 62 | 31 | 54 | 10.33 | 0.001 (0.003, 0.009)               |
| <i>DACH1</i>            |      |   |    |    |    |       |                                    |
| Panda                   | 9923 | 2 | 26 | 32 | 62 | 0.62  | 0.431 (0.479, 0.862)               |
| Dog                     | 9918 | 1 | 29 | 30 | 65 | 0.02  | 0.896 (0.896, 0.896)               |
| Cow                     | 9848 | 2 | 59 | 30 | 61 | 9.45  | 0.002 (0.005, 0.015)               |
| Dolphin                 | 9470 | 4 | 89 | 35 | 55 | 23.52 | <1x10 <sup>-5</sup> (0.000, 0.000) |
| <i>E. helvum</i>        | 9642 | 3 | 49 | 35 | 51 | 2.33  | 0.127 (0.159, 0.381)               |
| <i>P. vampyrus</i>      | 9527 | 2 | 54 | 37 | 50 | 3.18  | 0.075 (0.107, 0.299)               |
| <i>R. ferrumequinum</i> | 9775 | 2 | 63 | 37 | 57 | 6.76  | 0.009 (0.019, 0.056)               |
| <i>M. lyra</i>          | 9338 | 3 | 79 | 34 | 50 | 17.92 | 2x10 <sup>-5</sup> (0.000, 0.000)  |
| <i>M. lucifugus</i>     | 9772 | 2 | 64 | 40 | 54 | 5.54  | 0.019 (0.031, 0.093)               |
| <i>P. parnellii</i>     | 9385 | 2 | 66 | 34 | 52 | 10.24 | 0.001 (0.005, 0.011)               |
| <i>DLX1</i>             |      |   |    |    |    |       |                                    |
| Panda                   | 4746 | 3 | 38 | 36 | 46 | 0.05  | 0.816 (0.816, 1.000)               |
| Dog                     | 4726 | 5 | 35 | 32 | 46 | 0.13  | 0.714 (0.798, 1.000)               |
| Cow                     | 3812 | 4 | 30 | 26 | 33 | 0.29  | 0.593 (0.798, 1.000)               |
| Dolphin                 | 4542 | 7 | 36 | 33 | 42 | 0.13  | 0.718 (0.798, 1.000)               |
| <i>E. helvum</i>        | 4754 | 6 | 42 | 25 | 54 | 4.31  | 0.038 (0.076, 0.228)               |
| <i>P. vampyrus</i>      | 4647 | 4 | 53 | 25 | 55 | 10.05 | 0.002 (0.010, 0.018)               |
| <i>R. ferrumequinum</i> | 4695 | 3 | 54 | 33 | 50 | 5.07  | 0.024 (0.060, 0.168)               |
| <i>M. lyra</i>          | 4434 | 2 | 49 | 26 | 48 | 7.05  | 0.008 (0.027, 0.064)               |
| <i>M. lucifugus</i>     | 4652 | 5 | 83 | 32 | 43 | 22.62 | <1x10 <sup>-5</sup> (0.000, 0.000) |
| <i>P. parnellii</i>     | 4615 | 3 | 37 | 23 | 41 | 3.27  | 0.071 (0.118, 0.355)               |
| <i>EBF1</i>             |      |   |    |    |    |       |                                    |
| Panda                   | 1520 | 1 | 4  | 10 | 10 | 2.57  | 0.109 (0.363, 0.872)               |
| Dog                     | 1496 | 1 | 6  | 10 | 9  | 1.00  | 0.317 (0.634, 1.000)               |
| Cow                     | 1511 | 0 | 11 | 10 | 11 | 0.05  | 0.827 (0.919, 1.000)               |
| Dolphin                 | 1339 | 0 | 13 | 9  | 11 | 0.73  | 0.394 (0.657, 1.000)               |
| <i>E. helvum</i>        | 1509 | 0 | 3  | 10 | 10 | 3.77  | 0.052 (0.260, 0.520)               |
| <i>P. vampyrus</i>      | 1513 | 0 | 3  | 10 | 10 | 3.77  | 0.052 (0.260, 0.520)               |
| <i>R. ferrumequinum</i> | 1506 | 0 | 6  | 10 | 10 | 1.00  | 0.317 (0.634, 1.000)               |
| <i>M. lyra</i>          | 1504 | 0 | 11 | 8  | 12 | 0.47  | 0.491 (0.701, 1.000)               |
| <i>M. lucifugus</i>     | 1509 | 1 | 9  | 9  | 10 | 0.00  | 1.000 (1.000, 1.000)               |
| <i>P. parnellii</i>     | 1477 | 1 | 9  | 10 | 9  | 0.05  | 0.819 (0.919, 1.000)               |



|                         |      |   |     |    |    |       |                                    |
|-------------------------|------|---|-----|----|----|-------|------------------------------------|
| <i>EMX2</i>             |      |   |     |    |    |       |                                    |
| Panda                   | 6685 | 5 | 62  | 63 | 71 | 0.01  | 0.929 (0.929, 1.000)               |
| Dog                     | 6705 | 1 | 45  | 63 | 75 | 3.00  | 0.083 (0.208, 0.581)               |
| Cow                     | 6618 | 3 | 50  | 57 | 71 | 0.46  | 0.499 (0.713, 1.000)               |
| Dolphin                 | 6187 | 4 | 66  | 58 | 62 | 0.52  | 0.473 (0.713, 1.000)               |
| <i>E. helvum</i>        | 6629 | 3 | 59  | 69 | 69 | 0.78  | 0.377 (0.713, 1.000)               |
| <i>P. vampyrus</i>      | 6518 | 2 | 61  | 63 | 74 | 0.03  | 0.857 (0.929, 1.000)               |
| <i>R. ferrumequinum</i> | 6610 | 5 | 68  | 64 | 73 | 0.12  | 0.728 (0.910, 1.000)               |
| <i>M. lyra</i>          | 6325 | 6 | 96  | 60 | 73 | 8.31  | 0.004 (0.013, 0.032)               |
| <i>M. lucifugus</i>     | 6489 | 5 | 143 | 65 | 61 | 29.25 | <1x10 <sup>-5</sup> (0.000, 0.000) |
| <i>P. parnellii</i>     | 6405 | 5 | 100 | 61 | 68 | 9.45  | 0.002 (0.011, 0.019)               |
| <i>ESRRB</i>            |      |   |     |    |    |       |                                    |
| Panda                   | 3229 | 0 | 21  | 26 | 49 | 0.53  | 0.466 (0.556, 1.000)               |
| Dog                     | 3225 | 0 | 18  | 24 | 52 | 0.86  | 0.355 (0.507, 1.000)               |
| Cow                     | 3222 | 3 | 30  | 25 | 48 | 0.45  | 0.500 (0.556, 1.000)               |
| Dolphin                 | 3177 | 6 | 37  | 23 | 45 | 3.27  | 0.071 (0.178, 0.497)               |
| <i>E. helvum</i>        | 3180 | 3 | 39  | 27 | 43 | 2.18  | 0.140 (0.233, 0.700)               |
| <i>P. vampyrus</i>      | 2424 | 1 | 27  | 23 | 34 | 0.32  | 0.572 (0.572, 1.000)               |
| <i>R. ferrumequinum</i> | 3197 | 3 | 38  | 25 | 47 | 2.68  | 0.101 (0.202, 0.606)               |
| <i>M. lyra</i>          | 2877 | 4 | 51  | 24 | 43 | 9.72  | 0.002 (0.020, 0.020)               |
| <i>M. lucifugus</i>     | 3197 | 3 | 46  | 25 | 48 | 6.21  | 0.013 (0.043, 0.104)               |
| <i>P. parnellii</i>     | 3067 | 2 | 48  | 25 | 44 | 7.25  | 0.007 (0.035, 0.063)               |
| <i>EVII</i>             |      |   |     |    |    |       |                                    |
| Panda                   | 2529 | 0 | 13  | 15 | 14 | 0.14  | 0.705 (0.783, 1.000)               |
| Dog                     | 2538 | 0 | 11  | 14 | 16 | 0.36  | 0.549 (0.753, 1.000)               |
| Cow                     | 2586 | 1 | 20  | 16 | 16 | 0.44  | 0.505 (0.753, 1.000)               |
| Dolphin                 | 2582 | 1 | 24  | 17 | 15 | 1.20  | 0.274 (0.753, 1.000)               |
| <i>E. helvum</i>        | 2450 | 0 | 12  | 16 | 16 | 0.57  | 0.450 (0.753, 1.000)               |
| <i>P. vampyrus</i>      | 2427 | 0 | 17  | 14 | 16 | 0.29  | 0.590 (0.753, 1.000)               |
| <i>R. ferrumequinum</i> | 2588 | 1 | 16  | 17 | 14 | 0.03  | 0.862 (0.862, 1.000)               |
| <i>M. lyra</i>          | 2567 | 0 | 18  | 15 | 17 | 0.27  | 0.602 (0.753, 1.000)               |
| <i>M. lucifugus</i>     | 2589 | 0 | 22  | 17 | 16 | 0.64  | 0.423 (0.753, 1.000)               |
| <i>P. parnellii</i>     | 2489 | 0 | 23  | 15 | 17 | 1.68  | 0.194 (0.753, 1.000)               |
| <i>EYA1</i>             |      |   |     |    |    |       |                                    |
| Panda                   | 3682 | 4 | 51  | 79 | 73 | 6.03  | 0.014 (0.070, 0.126)               |
| Dog                     | 3669 | 3 | 49  | 80 | 75 | 7.45  | 0.006 (0.060, 0.060)               |
| Cow                     | 3559 | 4 | 91  | 78 | 76 | 1.00  | 0.317 (0.396, 0.951)               |
| Dolphin                 | 3417 | 3 | 64  | 65 | 71 | 0.01  | 0.930 (0.930, 0.988)               |
| <i>E. helvum</i>        | 3513 | 3 | 113 | 81 | 71 | 5.28  | 0.022 (0.073, 0.176)               |
| <i>P. vampyrus</i>      | 3346 | 5 | 107 | 81 | 67 | 3.60  | 0.058 (0.116, 0.348)               |
| <i>R. ferrumequinum</i> | 3590 | 1 | 91  | 82 | 66 | 0.47  | 0.494 (0.549, 0.988)               |
| <i>M. lyra</i>          | 3554 | 4 | 101 | 78 | 68 | 2.96  | 0.086 (0.143, 0.430)               |
| <i>M. lucifugus</i>     | 3594 | 7 | 89  | 69 | 69 | 2.53  | 0.112 (0.160, 0.448)               |
| <i>P. parnellii</i>     | 3667 | 1 | 61  | 85 | 71 | 3.95  | 0.047 (0.116, 0.329)               |
| <i>FIGN</i>             |      |   |     |    |    |       |                                    |
| Panda                   | 8844 | 2 | 67  | 35 | 51 | 10.04 | 0.002 (0.003, 0.008)               |
| Dog                     | 8849 | 3 | 67  | 34 | 53 | 10.78 | 0.001 (0.002, 0.006)               |
| Cow                     | 8801 | 1 | 56  | 40 | 46 | 2.67  | 0.102 (0.102, 0.102)               |
| Dolphin                 | 8234 | 2 | 80  | 35 | 51 | 17.61 | 3x10 <sup>-5</sup> (0.000, 0.000)  |
| <i>E. helvum</i>        | 8847 | 3 | 56  | 33 | 55 | 5.94  | 0.015 (0.019, 0.045)               |

|                         |       |    |     |     |     |        |                                     |
|-------------------------|-------|----|-----|-----|-----|--------|-------------------------------------|
| <i>P. vampyrus</i>      | 8213  | 4  | 68  | 32  | 54  | 12.96  | $3 \times 10^{-4}$ (0.001, 0.002)   |
| <i>R. ferrumequinum</i> | 8835  | 2  | 54  | 34  | 53  | 4.55   | 0.033 (0.037, 0.066)                |
| <i>M. lyra</i>          | 8817  | 2  | 84  | 39  | 49  | 16.46  | $5 \times 10^{-5}$ (0.000, 0.000)   |
| <i>M. lucifugus</i>     | 8826  | 2  | 76  | 35  | 53  | 15.14  | $1 \times 10^{-4}$ (0.000, 0.001)   |
| <i>P. parnellii</i>     | 8824  | 3  | 64  | 33  | 54  | 9.91   | 0.002 (0.003, 0.008)                |
| <i>FOXP1</i>            |       |    |     |     |     |        |                                     |
| Panda                   | 12080 | 10 | 114 | 101 | 117 | 0.79   | 0.375 (0.375, 0.390)                |
| Dog                     | 12107 | 3  | 78  | 102 | 121 | 3.20   | 0.074 (0.093, 0.222)                |
| Cow                     | 11905 | 8  | 169 | 93  | 116 | 22.05  | $< 1 \times 10^{-5}$ (0.000, 0.000) |
| Dolphin                 | 11339 | 7  | 163 | 94  | 105 | 18.53  | $2 \times 10^{-5}$ (0.000, 0.000)   |
| <i>E. helvum</i>        | 12013 | 4  | 137 | 104 | 117 | 4.52   | 0.034 (0.049, 0.136)                |
| <i>P. vampyrus</i>      | 11339 | 3  | 117 | 98  | 109 | 1.68   | 0.195 (0.217, 0.390)                |
| <i>R. ferrumequinum</i> | 11828 | 6  | 205 | 99  | 114 | 36.96  | $< 1 \times 10^{-5}$ (0.000, 0.000) |
| <i>M. lyra</i>          | 8382  | 9  | 387 | 59  | 59  | 241.22 | $< 1 \times 10^{-5}$ (0.000, 0.000) |
| <i>M. lucifugus</i>     | 9965  | 14 | 417 | 69  | 78  | 249.19 | $< 1 \times 10^{-5}$ (0.000, 0.000) |
| <i>P. parnellii</i>     | 11693 | 8  | 281 | 106 | 102 | 79.13  | $< 1 \times 10^{-5}$ (0.000, 0.000) |
| <i>GBX2</i>             |       |    |     |     |     |        |                                     |
| Panda                   | 1387  | 0  | 13  | 13  | 8   | 0.00   | 1.000 (1.000, 1.000)                |
| Dog                     | 1390  | 0  | 12  | 12  | 9   | 0.00   | 1.000 (1.000, 1.000)                |
| Cow                     | 1393  | 1  | 10  | 12  | 10  | 0.18   | 0.670 (0.838, 1.000)                |
| Dolphin                 | 1339  | 0  | 29  | 15  | 6   | 4.45   | 0.035 (0.117, 0.297)                |
| <i>E. helvum</i>        | 1383  | 0  | 28  | 13  | 10  | 5.49   | 0.019 (0.117, 0.190)                |
| <i>P. vampyrus</i>      | 1394  | 0  | 25  | 12  | 12  | 4.57   | 0.033 (0.117, 0.297)                |
| <i>R. ferrumequinum</i> | 1360  | 0  | 19  | 12  | 12  | 1.58   | 0.209 (0.418, 1.000)                |
| <i>M. lyra</i>          | 802   | 0  | 4   | 11  | 4   | 3.27   | 0.071 (0.178, 0.497)                |
| <i>M. lucifugus</i>     | 1389  | 0  | 16  | 12  | 10  | 0.57   | 0.450 (0.750, 1.000)                |
| <i>P. parnellii</i>     | 1180  | 1  | 11  | 14  | 5   | 0.36   | 0.549 (0.784, 1.000)                |
| <i>GLI3</i>             |       |    |     |     |     |        |                                     |
| Panda                   | 2151  | 0  | 42  | 35  | 31  | 0.64   | 0.425 (0.607, 1.000)                |
| Dog                     | 2148  | 2  | 31  | 35  | 28  | 0.24   | 0.622 (0.732, 1.000)                |
| Cow                     | 2161  | 0  | 36  | 38  | 29  | 0.05   | 0.816 (0.816, 1.000)                |
| Dolphin                 | 2137  | 0  | 43  | 39  | 28  | 0.20   | 0.659 (0.732, 1.000)                |
| <i>E. helvum</i>        | 2036  | 0  | 62  | 35  | 25  | 7.52   | 0.006 (0.023, 0.054)                |
| <i>P. vampyrus</i>      | 1815  | 0  | 61  | 32  | 20  | 9.04   | 0.003 (0.023, 0.030)                |
| <i>R. ferrumequinum</i> | 2048  | 2  | 49  | 30  | 25  | 4.57   | 0.033 (0.083, 0.231)                |
| <i>M. lyra</i>          | 2146  | 3  | 48  | 35  | 39  | 2.04   | 0.154 (0.308, 0.924)                |
| <i>M. lucifugus</i>     | 2137  | 1  | 47  | 36  | 29  | 1.46   | 0.227 (0.378, 1.000)                |
| <i>P. parnellii</i>     | 2103  | 3  | 59  | 33  | 26  | 7.35   | 0.007 (0.023, 0.056)                |
| <i>HMX2</i>             |       |    |     |     |     |        |                                     |
| Panda                   | 5019  | 3  | 56  | 34  | 56  | 5.38   | 0.020 (0.025, 0.060)                |
| Dog                     | 4994  | 1  | 48  | 34  | 57  | 2.39   | 0.122 (0.122, 0.122)                |
| Cow                     | 5027  | 1  | 59  | 35  | 57  | 6.13   | 0.013 (0.019, 0.052)                |
| Dolphin                 | 4835  | 2  | 84  | 30  | 55  | 25.58  | $< 1 \times 10^{-5}$ (0.000, 0.000) |
| <i>E. helvum</i>        | 4929  | 1  | 53  | 34  | 58  | 4.15   | 0.042 (0.047, 0.084)                |
| <i>P. vampyrus</i>      | 4349  | 2  | 55  | 31  | 46  | 6.70   | 0.010 (0.017, 0.050)                |
| <i>R. ferrumequinum</i> | 4905  | 2  | 55  | 29  | 60  | 8.05   | 0.005 (0.010, 0.030)                |
| <i>M. lyra</i>          | 4786  | 5  | 77  | 31  | 53  | 19.59  | $1 \times 10^{-5}$ (0.000, 0.000)   |
| <i>M. lucifugus</i>     | 3444  | 4  | 151 | 17  | 28  | 106.88 | $< 1 \times 10^{-5}$ (0.000, 0.000) |
| <i>P. parnellii</i>     | 4840  | 3  | 86  | 35  | 52  | 21.50  | $< 1 \times 10^{-5}$ (0.000, 0.000) |
| <i>IRX1/2/4</i>         |       |    |     |     |     |        |                                     |

|                         |       |    |      |     |     |        |                                    |
|-------------------------|-------|----|------|-----|-----|--------|------------------------------------|
| Panda                   | 14224 | 38 | 370  | 279 | 366 | 12.76  | $4 \times 10^{-3}$ (0.001, 0.002)  |
| Dog                     | 14247 | 39 | 333  | 281 | 386 | 4.40   | 0.036 (0.045, 0.108)               |
| Cow                     | 13088 | 40 | 446  | 237 | 323 | 63.95  | $<1 \times 10^{-5}$ (0.000, 0.000) |
| Dolphin                 | 13824 | 50 | 417  | 267 | 357 | 32.89  | $<1 \times 10^{-5}$ (0.000, 0.000) |
| <i>E. helvum</i>        | 10323 | 26 | 410  | 155 | 167 | 115.09 | $<1 \times 10^{-5}$ (0.000, 0.000) |
| <i>P. vampyrus</i>      | 10668 | 31 | 417  | 180 | 194 | 94.09  | $<1 \times 10^{-5}$ (0.000, 0.000) |
| <i>R. ferrumequinum</i> | 13923 | 39 | 395  | 266 | 338 | 25.18  | $<1 \times 10^{-5}$ (0.000, 0.000) |
| <i>M. lyra</i>          | 10939 | 32 | 421  | 177 | 238 | 99.56  | $<1 \times 10^{-5}$ (0.000, 0.000) |
| <i>M. lucifugus</i>     | 14512 | 48 | 306  | 291 | 382 | 0.38   | 0.539 (0.599, 1.000)               |
| <i>P. parnellii</i>     | 14438 | 42 | 294  | 291 | 376 | 0.02   | 0.901 (0.901, 1.000)               |
| <i>IRX3/5/6</i>         |       |    |      |     |     |        |                                    |
| Panda                   | 22780 | 28 | 357  | 325 | 327 | 1.50   | 0.220 (0.314, 0.880)               |
| Dog                     | 22938 | 24 | 263  | 345 | 314 | 11.06  | $9 \times 10^{-4}$ (0.002, 0.005)  |
| Cow                     | 22574 | 24 | 337  | 322 | 308 | 0.34   | 0.559 (0.559, 0.880)               |
| Dolphin                 | 21852 | 21 | 355  | 326 | 290 | 1.23   | 0.266 (0.322, 0.880)               |
| <i>E. helvum</i>        | 21805 | 23 | 548  | 299 | 316 | 73.20  | $<1 \times 10^{-5}$ (0.000, 0.000) |
| <i>P. vampyrus</i>      | 19550 | 22 | 465  | 284 | 259 | 43.74  | $<1 \times 10^{-5}$ (0.000, 0.000) |
| <i>R. ferrumequinum</i> | 22690 | 18 | 364  | 336 | 331 | 1.12   | 0.290 (0.322, 0.880)               |
| <i>M. lyra</i>          | 19594 | 24 | 511  | 245 | 267 | 93.59  | $<1 \times 10^{-5}$ (0.000, 0.000) |
| <i>M. lucifugus</i>     | 19975 | 42 | 1083 | 244 | 279 | 530.46 | $<1 \times 10^{-5}$ (0.000, 0.000) |
| <i>P. parnellii</i>     | 21655 | 36 | 532  | 310 | 279 | 58.53  | $<1 \times 10^{-5}$ (0.000, 0.000) |
| <i>LHX1</i>             |       |    |      |     |     |        |                                    |
| Panda                   | 2857  | 0  | 21   | 15  | 32  | 1.00   | 0.317 (0.690, 1.000)               |
| Dog                     | 2861  | 1  | 18   | 15  | 31  | 0.27   | 0.602 (0.857, 1.000)               |
| Cow                     | 2650  | 1  | 24   | 15  | 29  | 2.08   | 0.150 (0.500, 1.000)               |
| Dolphin                 | 2829  | 2  | 36   | 14  | 31  | 9.68   | 0.002 (0.020, 0.020)               |
| <i>E. helvum</i>        | 2852  | 0  | 16   | 14  | 31  | 0.13   | 0.715 (0.857, 1.000)               |
| <i>P. vampyrus</i>      | 2858  | 0  | 10   | 14  | 31  | 0.67   | 0.414 (0.690, 1.000)               |
| <i>R. ferrumequinum</i> | 2672  | 1  | 14   | 13  | 29  | 0.04   | 0.847 (0.857, 1.000)               |
| <i>M. lyra</i>          | 2743  | 1  | 23   | 13  | 27  | 2.78   | 0.096 (0.480, 0.864)               |
| <i>M. lucifugus</i>     | 2747  | 0  | 14   | 10  | 24  | 0.67   | 0.414 (0.690, 1.000)               |
| <i>P. parnellii</i>     | 2748  | 0  | 16   | 15  | 29  | 0.03   | 0.857 (0.857, 1.000)               |
| <i>LMO1</i>             |       |    |      |     |     |        |                                    |
| Panda                   | 3806  | 0  | 35   | 31  | 22  | 0.24   | 0.622 (0.892, 1.000)               |
| Dog                     | 3819  | 1  | 20   | 30  | 22  | 2.00   | 0.157 (0.314, 1.000)               |
| Cow                     | 3819  | 0  | 18   | 30  | 24  | 3.00   | 0.083 (0.314, 0.830)               |
| Dolphin                 | 3590  | 1  | 36   | 23  | 22  | 2.86   | 0.091 (0.314, 0.830)               |
| <i>E. helvum</i>        | 3803  | 1  | 30   | 31  | 22  | 0.02   | 0.898 (0.898, 1.000)               |
| <i>P. vampyrus</i>      | 3790  | 1  | 28   | 31  | 22  | 0.15   | 0.696 (0.892, 1.000)               |
| <i>R. ferrumequinum</i> | 3801  | 0  | 33   | 31  | 23  | 0.06   | 0.803 (0.892, 1.000)               |
| <i>M. lyra</i>          | 3018  | 1  | 36   | 24  | 17  | 2.40   | 0.121 (0.314, 0.968)               |
| <i>M. lucifugus</i>     | 3794  | 1  | 42   | 30  | 23  | 2.00   | 0.157 (0.314, 1.000)               |
| <i>P. parnellii</i>     | 3596  | 0  | 31   | 29  | 21  | 0.07   | 0.796 (0.892, 1.000)               |
| <i>LMO4</i>             |       |    |      |     |     |        |                                    |
| Panda                   | 4845  | 0  | 18   | 24  | 25  | 0.86   | 0.355 (0.592, 1.000)               |
| Dog                     | 4702  | 0  | 20   | 24  | 22  | 0.36   | 0.546 (0.683, 1.000)               |
| Cow                     | 4814  | 0  | 32   | 24  | 24  | 1.14   | 0.285 (0.570, 1.000)               |
| Dolphin                 | 4816  | 1  | 44   | 24  | 24  | 5.88   | 0.015 (0.150, 0.150)               |
| <i>E. helvum</i>        | 4848  | 0  | 16   | 24  | 25  | 1.60   | 0.206 (0.570, 1.000)               |
| <i>P. vampyrus</i>      | 4710  | 0  | 17   | 22  | 24  | 0.64   | 0.423 (0.604, 1.000)               |

|                         |       |    |     |     |     |       |                                    |
|-------------------------|-------|----|-----|-----|-----|-------|------------------------------------|
| <i>R. ferrumequinum</i> | 4834  | 0  | 28  | 27  | 22  | 0.02  | 0.892 (0.892, 1.000)               |
| <i>M. lyra</i>          | 4164  | 2  | 35  | 23  | 19  | 2.48  | 0.115 (0.570, 1.000)               |
| <i>M. lucifugus</i>     | 4791  | 0  | 32  | 24  | 25  | 1.14  | 0.285 (0.570, 1.000)               |
| <i>P. parnellii</i>     | 4830  | 1  | 27  | 25  | 23  | 0.08  | 0.782 (0.869, 1.000)               |
| <i>MAF</i>              |       |    |     |     |     |       |                                    |
| Panda                   | 4553  | 1  | 31  | 36  | 62  | 0.37  | 0.541 (0.601, 1.000)               |
| Dog                     | 4480  | 1  | 33  | 33  | 61  | 0.00  | 1.000 (1.000, 1.000)               |
| Cow                     | 4483  | 5  | 79  | 36  | 55  | 16.08 | 6x10 <sup>-5</sup> (0.000, 0.001)  |
| Dolphin                 | 4116  | 3  | 75  | 27  | 60  | 22.59 | <1x10 <sup>-5</sup> (0.000, 0.000) |
| <i>E. helvum</i>        | 4336  | 2  | 40  | 33  | 61  | 0.67  | 0.413 (0.516, 1.000)               |
| <i>P. vampyrus</i>      | 4056  | 2  | 43  | 31  | 56  | 1.95  | 0.163 (0.233, 0.652)               |
| <i>R. ferrumequinum</i> | 4401  | 3  | 51  | 31  | 60  | 4.88  | 0.027 (0.054, 0.162)               |
| <i>M. lyra</i>          | 4095  | 3  | 56  | 28  | 51  | 9.33  | 0.002 (0.007, 0.016)               |
| <i>M. lucifugus</i>     | 4363  | 2  | 45  | 30  | 63  | 3.00  | 0.083 (0.138, 0.415)               |
| <i>P. parnellii</i>     | 4106  | 2  | 53  | 31  | 59  | 5.76  | 0.016 (0.040, 0.112)               |
| <i>MEIS1</i>            |       |    |     |     |     |       |                                    |
| Panda                   | 5394  | 1  | 29  | 33  | 52  | 0.26  | 0.611 (0.764, 1.000)               |
| Dog                     | 4369  | 1  | 36  | 31  | 41  | 0.37  | 0.541 (0.764, 1.000)               |
| Cow                     | 5047  | 5  | 38  | 32  | 37  | 0.51  | 0.473 (0.764, 1.000)               |
| Dolphin                 | 4624  | 3  | 62  | 28  | 40  | 12.84 | 3x10 <sup>-4</sup> (0.003, 0.003)  |
| <i>E. helvum</i>        | 5369  | 1  | 33  | 38  | 42  | 0.35  | 0.553 (0.764, 1.000)               |
| <i>P. vampyrus</i>      | 4847  | 1  | 35  | 34  | 41  | 0.01  | 0.904 (0.907, 1.000)               |
| <i>R. ferrumequinum</i> | 5337  | 2  | 37  | 36  | 45  | 0.01  | 0.907 (0.907, 1.000)               |
| <i>M. lyra</i>          | 5230  | 3  | 64  | 33  | 40  | 9.91  | 0.002 (0.010, 0.018)               |
| <i>M. lucifugus</i>     | 5336  | 3  | 59  | 34  | 46  | 6.72  | 0.010 (0.033, 0.080)               |
| <i>P. parnellii</i>     | 5292  | 3  | 57  | 37  | 44  | 4.26  | 0.039 (0.098, 0.273)               |
| <i>MEIS2</i>            |       |    |     |     |     |       |                                    |
| Panda                   | 16830 | 3  | 113 | 112 | 139 | 0.00  | 0.947 (0.948, 1.000)               |
| Dog                     | 16766 | 1  | 114 | 115 | 134 | 0.00  | 0.948 (0.948, 1.000)               |
| Cow                     | 16831 | 2  | 126 | 115 | 133 | 0.50  | 0.479 (0.684, 1.000)               |
| Dolphin                 | 16103 | 4  | 156 | 111 | 131 | 7.58  | 0.006 (0.015, 0.042)               |
| <i>E. helvum</i>        | 16572 | 3  | 118 | 116 | 133 | 0.02  | 0.896 (0.948, 1.000)               |
| <i>P. vampyrus</i>      | 15672 | 2  | 133 | 109 | 127 | 2.38  | 0.123 (0.246, 0.738)               |
| <i>R. ferrumequinum</i> | 16882 | 2  | 129 | 112 | 143 | 1.20  | 0.273 (0.455, 1.000)               |
| <i>M. lyra</i>          | 16133 | 5  | 191 | 107 | 127 | 23.68 | <1x10 <sup>-5</sup> (0.000, 0.000) |
| <i>M. lucifugus</i>     | 16763 | 5  | 221 | 112 | 135 | 35.68 | <1x10 <sup>-5</sup> (0.000, 0.000) |
| <i>P. parnellii</i>     | 16662 | 1  | 170 | 107 | 141 | 14.33 | 2x10 <sup>-4</sup> (0.001, 0.001)  |
| <i>NR2F1</i>            |       |    |     |     |     |       |                                    |
| Panda                   | 15960 | 15 | 152 | 139 | 182 | 0.58  | 0.446 (0.496, 0.892)               |
| Dog                     | 15869 | 15 | 130 | 131 | 186 | 0.00  | 0.951 (0.951, 0.951)               |
| Cow                     | 15047 | 14 | 172 | 120 | 183 | 9.26  | 0.002 (0.007, 0.016)               |
| Dolphin                 | 15083 | 10 | 170 | 131 | 174 | 5.05  | 0.025 (0.042, 0.125)               |
| <i>E. helvum</i>        | 15923 | 11 | 196 | 143 | 179 | 8.29  | 0.004 (0.010, 0.028)               |
| <i>P. vampyrus</i>      | 15985 | 8  | 178 | 142 | 190 | 4.05  | 0.044 (0.055, 0.176)               |
| <i>R. ferrumequinum</i> | 15985 | 8  | 178 | 142 | 190 | 4.05  | 0.044 (0.055, 0.176)               |
| <i>M. lyra</i>          | 15728 | 10 | 211 | 128 | 185 | 20.32 | 1x10 <sup>-5</sup> (0.000, 0.000)  |
| <i>M. lucifugus</i>     | 15839 | 10 | 186 | 142 | 181 | 5.90  | 0.015 (0.030, 0.090)               |
| <i>P. parnellii</i>     | 15787 | 13 | 211 | 136 | 187 | 16.21 | 6x10 <sup>-5</sup> (0.000, 0.001)  |
| <i>NR2F2</i>            |       |    |     |     |     |       |                                    |
| Panda                   | 12870 | 20 | 181 | 129 | 178 | 8.72  | 0.003 (0.003, 0.006)               |

|                         |       |    |     |     |     |        |                                    |
|-------------------------|-------|----|-----|-----|-----|--------|------------------------------------|
| Dog                     | 12710 | 14 | 176 | 136 | 170 | 5.13   | 0.024 (0.024, 0.024)               |
| Cow                     | 12739 | 16 | 227 | 118 | 180 | 34.44  | <1x10 <sup>-5</sup> (0.000, 0.000) |
| Dolphin                 | 11937 | 13 | 240 | 127 | 165 | 34.79  | <1x10 <sup>-5</sup> (0.000, 0.000) |
| <i>E. helvum</i>        | 11822 | 21 | 405 | 127 | 156 | 145.27 | <1x10 <sup>-5</sup> (0.000, 0.000) |
| <i>P. vampyrus</i>      | 10752 | 14 | 385 | 108 | 145 | 155.64 | <1x10 <sup>-5</sup> (0.000, 0.000) |
| <i>R. ferrumequinum</i> | 12070 | 21 | 357 | 118 | 164 | 120.25 | <1x10 <sup>-5</sup> (0.000, 0.000) |
| <i>M. lyra</i>          | 10728 | 18 | 442 | 103 | 141 | 210.86 | <1x10 <sup>-5</sup> (0.000, 0.000) |
| <i>M. lucifugus</i>     | 10297 | 25 | 695 | 102 | 129 | 441.22 | <1x10 <sup>-5</sup> (0.000, 0.000) |
| <i>P. parnellii</i>     | 11603 | 19 | 456 | 124 | 154 | 190.04 | <1x10 <sup>-5</sup> (0.000, 0.000) |
| PAX2                    |       |    |     |     |     |        |                                    |
| Panda                   | 8459  | 2  | 21  | 29  | 43  | 1.28   | 0.258 (0.323, 0.945)               |
| Dog                     | 7705  | 1  | 49  | 27  | 44  | 6.37   | 0.012 (0.040, 0.096)               |
| Cow                     | 8271  | 2  | 24  | 35  | 36  | 2.05   | 0.152 (0.304, 0.912)               |
| Dolphin                 | 7220  | 2  | 86  | 22  | 34  | 37.93  | <1x10 <sup>-5</sup> (0.000, 0.000) |
| <i>E. helvum</i>        | 7954  | 2  | 34  | 24  | 37  | 1.72   | 0.189 (0.315, 0.945)               |
| <i>P. vampyrus</i>      | 7659  | 1  | 39  | 32  | 40  | 0.69   | 0.406 (0.451, 0.945)               |
| <i>R. ferrumequinum</i> | 8299  | 5  | 33  | 19  | 34  | 3.77   | 0.052 (0.130, 0.364)               |
| <i>M. lyra</i>          | 6728  | 1  | 36  | 17  | 32  | 6.81   | 0.009 (0.040, 0.081)               |
| <i>M. lucifugus</i>     | 8005  | 3  | 38  | 32  | 37  | 0.51   | 0.473 (0.473, 0.945)               |
| <i>P. parnellii</i>     | 7244  | 2  | 26  | 18  | 37  | 1.45   | 0.228 (0.323, 0.945)               |
| PAX3                    |       |    |     |     |     |        |                                    |
| Panda                   | 957   | 0  | 8   | 14  | 9   | 1.64   | 0.201 (0.759, 1.000)               |
| Dog                     | 956   | 0  | 6   | 14  | 9   | 3.20   | 0.074 (0.740, 0.740)               |
| Cow                     | 957   | 1  | 9   | 14  | 8   | 1.09   | 0.297 (0.759, 1.000)               |
| Dolphin                 | 822   | 0  | 8   | 11  | 10  | 0.47   | 0.491 (0.759, 1.000)               |
| <i>E. helvum</i>        | 954   | 0  | 12  | 13  | 10  | 0.04   | 0.841 (0.841, 1.000)               |
| <i>P. vampyrus</i>      | 766   | 0  | 10  | 8   | 6   | 0.22   | 0.637 (0.759, 1.000)               |
| <i>R. ferrumequinum</i> | 950   | 0  | 10  | 15  | 8   | 1.00   | 0.317 (0.759, 1.000)               |
| <i>M. lyra</i>          | 945   | 0  | 19  | 15  | 8   | 0.47   | 0.493 (0.759, 1.000)               |
| <i>M. lucifugus</i>     | 955   | 0  | 11  | 13  | 10  | 0.17   | 0.683 (0.759, 1.000)               |
| <i>P. parnellii</i>     | 947   | 0  | 10  | 13  | 10  | 0.39   | 0.532 (0.759, 1.000)               |
| PAX5                    |       |    |     |     |     |        |                                    |
| Panda                   | 291   | 0  | 0   | 1   | 2   | 1.00   | 0.317 (0.528, 1.000)               |
| Dog                     | 291   | 0  | 0   | 2   | 1   | 2.00   | 0.157 (0.528, 1.000)               |
| Cow                     | 291   | 0  | 0   | 2   | 1   | 2.00   | 0.157 (0.528, 1.000)               |
| Dolphin                 | 289   | 0  | 2   | 2   | 1   | 0.00   | 1.000 (1.000, 1.000)               |
| <i>E. helvum</i>        | 289   | 0  | 2   | 1   | 2   | 0.33   | 0.564 (0.806, 1.000)               |
| <i>P. vampyrus</i>      | 291   | 0  | 0   | 1   | 2   | 1.00   | 0.317 (0.528, 1.000)               |
| <i>R. ferrumequinum</i> | 291   | 0  | 0   | 1   | 2   | 1.00   | 0.317 (0.528, 1.000)               |
| <i>M. lyra</i>          | 123   | 0  | 0   | 0   | 2   | 0.00   | 1.000 (1.000, 1.000)               |
| <i>M. lucifugus</i>     | 291   | 0  | 0   | 1   | 2   | 1.00   | 0.317 (0.528, 1.000)               |
| <i>P. parnellii</i>     | 261   | 0  | 1   | 1   | 2   | 0.00   | 1.000 (1.000, 1.000)               |
| PAX7                    |       |    |     |     |     |        |                                    |
| Panda                   | 1620  | 1  | 17  | 17  | 11  | 0.00   | 1.000 (1.000, 1.000)               |
| Dog                     | 1618  | 2  | 25  | 16  | 11  | 1.98   | 0.160 (0.533, 1.000)               |
| Cow                     | 1406  | 2  | 21  | 10  | 7   | 3.90   | 0.048 (0.240, 0.432)               |
| Dolphin                 | 1505  | 2  | 18  | 14  | 11  | 0.50   | 0.480 (0.800, 1.000)               |
| <i>E. helvum</i>        | 1559  | 1  | 18  | 14  | 13  | 0.50   | 0.480 (0.800, 1.000)               |
| <i>P. vampyrus</i>      | 1416  | 1  | 15  | 14  | 11  | 0.03   | 0.853 (0.952, 1.000)               |
| <i>R. ferrumequinum</i> | 1621  | 1  | 16  | 15  | 13  | 0.03   | 0.857 (0.952, 1.000)               |

|                         |      |    |     |     |     |       |                                    |
|-------------------------|------|----|-----|-----|-----|-------|------------------------------------|
| <i>M. lyra</i>          | 924  | 1  | 11  | 9   | 4   | 0.20  | 0.655 (0.936, 1.000)               |
| <i>M. lucifugus</i>     | 1023 | 1  | 16  | 6   | 4   | 4.55  | 0.033 (0.240, 0.330)               |
| <i>P. parnellii</i>     | 1477 | 2  | 17  | 12  | 10  | 0.86  | 0.353 (0.800, 1.000)               |
| <i>PAX8</i>             |      |    |     |     |     |       |                                    |
| Panda                   | 157  | 0  | 0   | 0   | 3   | 0.00  | 1.000 (1.000, 1.000)               |
| Dog                     | 157  | 0  | 0   | 0   | 3   | 0.00  | 1.000 (1.000, 1.000)               |
| Cow                     | 157  | 0  | 0   | 0   | 3   | 0.00  | 1.000 (1.000, 1.000)               |
| Dolphin                 | 157  | 0  | 0   | 0   | 3   | 0.00  | 1.000 (1.000, 1.000)               |
| <i>E. helvum</i>        | 149  | 0  | 4   | 0   | 3   | 4.00  | 0.046 (0.415, 0.460)               |
| <i>P. vampyrus</i>      | 152  | 0  | 1   | 0   | 3   | 1.00  | 0.317 (0.793, 1.000)               |
| <i>R. ferrumequinum</i> | 127  | 0  | 3   | 0   | 2   | 3.00  | 0.083 (0.415, 0.747)               |
| <i>M. lyra</i>          | 151  | 0  | 2   | 0   | 3   | 2.00  | 0.157 (0.523, 1.000)               |
| <i>M. lucifugus</i>     | 157  | 0  | 0   | 0   | 3   | 0.00  | 1.000 (1.000, 1.000)               |
| <i>P. parnellii</i>     | 79   | 0  | 0   | 0   | 1   | 0.00  | 1.000 (1.000, 1.000)               |
| <i>POU3F3</i>           |      |    |     |     |     |       |                                    |
| Panda                   | 2140 | 5  | 23  | 21  | 20  | 0.09  | 0.763 (0.848, 1.000)               |
| Dog                     | 2151 | 3  | 14  | 20  | 23  | 1.06  | 0.303 (0.490, 1.000)               |
| Cow                     | 2104 | 4  | 40  | 16  | 25  | 10.29 | 0.001 (0.010, 0.010)               |
| Dolphin                 | 2126 | 4  | 28  | 19  | 22  | 1.72  | 0.189 (0.473, 1.000)               |
| <i>E. helvum</i>        | 2113 | 2  | 16  | 22  | 18  | 0.95  | 0.330 (0.490, 1.000)               |
| <i>P. vampyrus</i>      | 1590 | 0  | 9   | 11  | 8   | 0.20  | 0.654 (0.818, 1.000)               |
| <i>R. ferrumequinum</i> | 2125 | 2  | 17  | 23  | 20  | 0.90  | 0.343 (0.490, 1.000)               |
| <i>M. lyra</i>          | 2012 | 3  | 22  | 22  | 14  | 0.00  | 1.000 (1.000, 1.000)               |
| <i>M. lucifugus</i>     | 2102 | 2  | 33  | 19  | 20  | 3.77  | 0.052 (0.173, 0.416)               |
| <i>P. parnellii</i>     | 2109 | 2  | 45  | 21  | 23  | 8.73  | 0.003 (0.015, 0.027)               |
| <i>SALL3</i>            |      |    |     |     |     |       |                                    |
| Panda                   | 7181 | 14 | 176 | 101 | 166 | 20.31 | 1x10 <sup>-5</sup> (0.000, 0.000)  |
| Dog                     | 6874 | 11 | 126 | 89  | 154 | 6.37  | 0.012 (0.012, 0.012)               |
| Cow                     | 6866 | 19 | 168 | 92  | 153 | 22.22 | <1x10 <sup>-5</sup> (0.000, 0.000) |
| Dolphin                 | 6960 | 15 | 227 | 92  | 175 | 57.13 | <1x10 <sup>-5</sup> (0.000, 0.000) |
| <i>E. helvum</i>        | 5664 | 10 | 213 | 70  | 101 | 72.26 | <1x10 <sup>-5</sup> (0.000, 0.000) |
| <i>P. vampyrus</i>      | 5261 | 11 | 191 | 74  | 106 | 51.66 | <1x10 <sup>-5</sup> (0.000, 0.000) |
| <i>R. ferrumequinum</i> | 6783 | 17 | 220 | 88  | 145 | 56.57 | <1x10 <sup>-5</sup> (0.000, 0.000) |
| <i>M. lyra</i>          | 3213 | 5  | 141 | 36  | 45  | 62.29 | <1x10 <sup>-5</sup> (0.000, 0.000) |
| <i>M. lucifugus</i>     | 6885 | 16 | 232 | 94  | 148 | 58.42 | <1x10 <sup>-5</sup> (0.000, 0.000) |
| <i>P. parnellii</i>     | 4130 | 10 | 152 | 51  | 79  | 50.25 | <1x10 <sup>-5</sup> (0.000, 0.000) |
| <i>SHH</i>              |      |    |     |     |     |       |                                    |
| Panda                   | 3085 | 7  | 65  | 58  | 85  | 0.40  | 0.528 (0.587, 1.000)               |
| Dog                     | 3074 | 8  | 60  | 58  | 84  | 0.03  | 0.854 (0.854, 1.000)               |
| Cow                     | 2924 | 6  | 90  | 60  | 76  | 6.00  | 0.014 (0.020, 0.056)               |
| Dolphin                 | 2789 | 4  | 79  | 54  | 71  | 4.70  | 0.030 (0.038, 0.090)               |
| <i>E. helvum</i>        | 2766 | 12 | 117 | 37  | 61  | 41.56 | <1x10 <sup>-5</sup> (0.000, 0.000) |
| <i>P. vampyrus</i>      | 2788 | 9  | 103 | 41  | 62  | 26.69 | <1x10 <sup>-5</sup> (0.000, 0.000) |
| <i>R. ferrumequinum</i> | 3003 | 13 | 96  | 53  | 76  | 12.41 | 4x10 <sup>-4</sup> (0.001, 0.002)  |
| <i>M. lyra</i>          | 2445 | 7  | 108 | 46  | 65  | 24.96 | <1x10 <sup>-5</sup> (0.000, 0.000) |
| <i>M. lucifugus</i>     | 2572 | 10 | 95  | 42  | 57  | 20.50 | 1x10 <sup>-5</sup> (0.000, 0.000)  |
| <i>P. parnellii</i>     | 1656 | 4  | 89  | 26  | 38  | 34.51 | <1x10 <sup>-5</sup> (0.000, 0.000) |
| <i>SHOX</i>             |      |    |     |     |     |       |                                    |
| Panda                   | 747  | 3  | 30  | 56  | 28  | 7.86  | 0.005 (0.017, 0.040)               |
| Dog                     | 735  | 2  | 22  | 56  | 23  | 14.82 | 1x10 <sup>-4</sup> (0.001, 0.001)  |

|                         |      |   |     |    |    |       |                                     |
|-------------------------|------|---|-----|----|----|-------|-------------------------------------|
| Cow                     | 611  | 3 | 17  | 34 | 28 | 5.67  | 0.017 (0.043, 0.119)                |
| Dolphin                 | 759  | 4 | 22  | 53 | 30 | 12.81 | $3 \times 10^{-4}$ (0.002, 0.003)   |
| <i>E. helvum</i>        | 550  | 4 | 32  | 36 | 28 | 0.24  | 0.628 (0.758, 1.000)                |
| <i>P. vampyrus</i>      | 687  | 5 | 37  | 41 | 33 | 0.21  | 0.651 (0.758, 1.000)                |
| <i>R. ferrumequinum</i> | 667  | 1 | 32  | 50 | 29 | 3.95  | 0.047 (0.094, 0.282)                |
| <i>M. lyra</i>          | 202  | 1 | 10  | 16 | 10 | 1.38  | 0.239 (0.398, 1.000)                |
| <i>M. lucifugus</i>     | 88   | 1 | 3   | 4  | 10 | 0.14  | 0.705 (0.758, 1.000)                |
| <i>P. parnellii</i>     | 369  | 1 | 20  | 22 | 19 | 0.10  | 0.758 (0.758, 1.000)                |
| <i>SHOX2</i>            |      |   |     |    |    |       |                                     |
| Panda                   | 5375 | 0 | 40  | 58 | 42 | 3.31  | 0.069 (0.115, 0.408)                |
| Dog                     | 5365 | 1 | 44  | 53 | 46 | 0.84  | 0.361 (0.401, 0.777)                |
| Cow                     | 5389 | 1 | 33  | 57 | 39 | 6.40  | 0.011 (0.047, 0.110)                |
| Dolphin                 | 5338 | 0 | 49  | 52 | 43 | 0.09  | 0.765 (0.765, 0.777)                |
| <i>E. helvum</i>        | 5399 | 1 | 34  | 56 | 41 | 5.38  | 0.020 (0.050, 0.140)                |
| <i>P. vampyrus</i>      | 5143 | 1 | 32  | 55 | 36 | 6.08  | 0.014 (0.047, 0.112)                |
| <i>R. ferrumequinum</i> | 5422 | 2 | 35  | 52 | 47 | 3.32  | 0.068 (0.115, 0.408)                |
| <i>M. lyra</i>          | 5257 | 1 | 42  | 53 | 39 | 1.27  | 0.259 (0.324, 0.777)                |
| <i>M. lucifugus</i>     | 5404 | 1 | 43  | 58 | 41 | 2.23  | 0.136 (0.194, 0.544)                |
| <i>P. parnellii</i>     | 5339 | 1 | 32  | 56 | 39 | 6.55  | 0.011 (0.047, 0.110)                |
| <i>SOX2</i>             |      |   |     |    |    |       |                                     |
| Panda                   | 2588 | 0 | 6   | 8  | 10 | 0.29  | 0.593 (0.659, 1.000)                |
| Dog                     | 2594 | 0 | 8   | 6  | 12 | 0.29  | 0.593 (0.659, 1.000)                |
| Cow                     | 2588 | 0 | 10  | 7  | 11 | 0.53  | 0.467 (0.659, 1.000)                |
| Dolphin                 | 2570 | 1 | 14  | 6  | 11 | 3.20  | 0.074 (0.247, 0.592)                |
| <i>E. helvum</i>        | 2405 | 0 | 11  | 6  | 9  | 1.47  | 0.225 (0.375, 1.000)                |
| <i>P. vampyrus</i>      | 2358 | 1 | 13  | 7  | 10 | 1.80  | 0.180 (0.360, 1.000)                |
| <i>R. ferrumequinum</i> | 2407 | 1 | 7   | 6  | 7  | 0.08  | 0.782 (0.782, 1.000)                |
| <i>M. lyra</i>          | 2409 | 0 | 15  | 8  | 7  | 2.13  | 0.144 (0.360, 1.000)                |
| <i>M. lucifugus</i>     | 2581 | 0 | 22  | 9  | 9  | 5.45  | 0.020 (0.100, 0.180)                |
| <i>P. parnellii</i>     | 2468 | 0 | 27  | 7  | 8  | 11.76 | 0.001 (0.010, 0.010)                |
| <i>SOX3</i>             |      |   |     |    |    |       |                                     |
| Panda                   | 1357 | 0 | 10  | 5  | 13 | 1.00  | 0.317 (0.352, 0.634)                |
| Dog                     | 1359 | 0 | 8   | 6  | 13 | 0.29  | 0.593 (0.593, 0.634)                |
| Cow                     | 1346 | 1 | 19  | 5  | 13 | 8.17  | 0.004 (0.007, 0.020)                |
| Dolphin                 | 1263 | 1 | 21  | 4  | 13 | 11.56 | $7 \times 10^{-4}$ (0.002, 0.006)   |
| <i>E. helvum</i>        | 1268 | 0 | 18  | 6  | 10 | 6.00  | 0.014 (0.020, 0.056)                |
| <i>P. vampyrus</i>      | 1235 | 0 | 22  | 5  | 12 | 10.70 | 0.001 (0.002, 0.008)                |
| <i>R. ferrumequinum</i> | 1346 | 1 | 20  | 4  | 14 | 10.67 | 0.001 (0.002, 0.008)                |
| <i>M. lyra</i>          | 1290 | 2 | 28  | 6  | 11 | 14.24 | $2 \times 10^{-4}$ (0.002, 0.002)   |
| <i>M. lucifugus</i>     | 1351 | 1 | 14  | 5  | 13 | 4.26  | 0.039 (0.049, 0.117)                |
| <i>P. parnellii</i>     | 1285 | 1 | 22  | 5  | 11 | 10.70 | 0.001 (0.002, 0.008)                |
| <i>SOX6</i>             |      |   |     |    |    |       |                                     |
| Panda                   | 7364 | 5 | 54  | 47 | 71 | 0.49  | 0.486 (0.608, 1.000)                |
| Dog                     | 7356 | 6 | 53  | 47 | 71 | 0.36  | 0.549 (0.610, 1.000)                |
| Cow                     | 7350 | 2 | 54  | 53 | 68 | 0.01  | 0.923 (0.923, 1.000)                |
| Dolphin                 | 6587 | 4 | 70  | 40 | 72 | 8.18  | 0.004 (0.008, 0.024)                |
| <i>E. helvum</i>        | 7218 | 4 | 60  | 47 | 70 | 1.58  | 0.209 (0.299, 0.836)                |
| <i>P. vampyrus</i>      | 6559 | 4 | 70  | 41 | 61 | 7.58  | 0.006 (0.010, 0.030)                |
| <i>R. ferrumequinum</i> | 7173 | 6 | 110 | 44 | 66 | 28.29 | $< 1 \times 10^{-5}$ (0.000, 0.000) |
| <i>M. lyra</i>          | 7035 | 4 | 89  | 41 | 61 | 17.72 | $3 \times 10^{-5}$ (0.000, 0.000)   |

|                         |       |   |     |     |     |       |                                     |
|-------------------------|-------|---|-----|-----|-----|-------|-------------------------------------|
| <i>M. lucifugus</i>     | 7298  | 4 | 86  | 47  | 68  | 11.44 | $7 \times 10^{-4}$ (0.002, 0.006)   |
| <i>P. parnellii</i>     | 7042  | 3 | 78  | 43  | 60  | 10.12 | 0.001 (0.003, 0.007)                |
| <i>SOX21</i>            |       |   |     |     |     |       |                                     |
| Panda                   | 4200  | 5 | 64  | 51  | 66  | 1.47  | 0.225 (0.375, 1.000)                |
| Dog                     | 4232  | 7 | 49  | 49  | 66  | 0.00  | 1.000 (1.000, 1.000)                |
| Cow                     | 4045  | 4 | 51  | 45  | 55  | 0.38  | 0.540 (0.675, 1.000)                |
| Dolphin                 | 4154  | 3 | 85  | 50  | 68  | 9.07  | 0.003 (0.015, 0.027)                |
| <i>E. helvum</i>        | 4259  | 1 | 38  | 52  | 70  | 2.18  | 0.140 (0.280, 0.840)                |
| <i>P. vampyrus</i>      | 3626  | 4 | 55  | 47  | 61  | 0.63  | 0.428 (0.611, 1.000)                |
| <i>R. ferrumequinum</i> | 4242  | 2 | 49  | 54  | 67  | 0.24  | 0.622 (0.691, 1.000)                |
| <i>M. lyra</i>          | 3674  | 4 | 80  | 50  | 67  | 6.92  | 0.009 (0.023, 0.063)                |
| <i>M. lucifugus</i>     | 4202  | 2 | 81  | 50  | 71  | 7.34  | 0.007 (0.023, 0.056)                |
| <i>P. parnellii</i>     | 4123  | 5 | 108 | 56  | 60  | 16.49 | $5 \times 10^{-5}$ (0.001, 0.001)   |
| <i>TFAP2A</i>           |       |   |     |     |     |       |                                     |
| Panda                   | 8060  | 8 | 95  | 92  | 107 | 0.05  | 0.826 (0.832, 1.000)                |
| Dog                     | 7860  | 7 | 76  | 88  | 104 | 0.88  | 0.349 (0.541, 1.000)                |
| Cow                     | 7813  | 9 | 162 | 91  | 101 | 19.92 | $1 \times 10^{-5}$ (0.000, 0.000)   |
| Dolphin                 | 7661  | 4 | 162 | 89  | 112 | 21.23 | $< 1 \times 10^{-5}$ (0.000, 0.000) |
| <i>E. helvum</i>        | 8111  | 5 | 98  | 101 | 111 | 0.05  | 0.832 (0.832, 1.000)                |
| <i>P. vampyrus</i>      | 7425  | 5 | 87  | 96  | 106 | 0.44  | 0.506 (0.633, 1.000)                |
| <i>R. ferrumequinum</i> | 7977  | 6 | 99  | 87  | 117 | 0.77  | 0.379 (0.541, 1.000)                |
| <i>M. lyra</i>          | 7301  | 9 | 227 | 80  | 87  | 70.39 | $< 1 \times 10^{-5}$ (0.000, 0.000) |
| <i>M. lucifugus</i>     | 7987  | 8 | 120 | 93  | 106 | 3.42  | 0.064 (0.128, 0.384)                |
| <i>P. parnellii</i>     | 7935  | 8 | 129 | 93  | 113 | 5.84  | 0.016 (0.040, 0.112)                |
| <i>TSHZ1</i>            |       |   |     |     |     |       |                                     |
| Panda                   | 7835  | 5 | 66  | 55  | 93  | 1.00  | 0.317 (0.317, 0.317)                |
| Dog                     | 7793  | 3 | 69  | 53  | 93  | 2.10  | 0.147 (0.163, 0.294)                |
| Cow                     | 7752  | 1 | 83  | 60  | 92  | 3.70  | 0.054 (0.068, 0.162)                |
| Dolphin                 | 7287  | 4 | 142 | 50  | 89  | 44.08 | $< 1 \times 10^{-5}$ (0.000, 0.000) |
| <i>E. helvum</i>        | 6552  | 4 | 87  | 42  | 60  | 15.70 | $7 \times 10^{-5}$ (0.000, 0.000)   |
| <i>P. vampyrus</i>      | 6519  | 6 | 128 | 40  | 65  | 46.10 | $< 1 \times 10^{-5}$ (0.000, 0.000) |
| <i>R. ferrumequinum</i> | 7834  | 4 | 89  | 54  | 96  | 8.57  | 0.003 (0.004, 0.012)                |
| <i>M. lyra</i>          | 6152  | 5 | 96  | 42  | 69  | 21.13 | $< 1 \times 10^{-5}$ (0.000, 0.000) |
| <i>M. lucifugus</i>     | 7676  | 6 | 119 | 56  | 94  | 22.68 | $< 1 \times 10^{-5}$ (0.000, 0.000) |
| <i>P. parnellii</i>     | 6319  | 7 | 151 | 36  | 54  | 70.72 | $< 1 \times 10^{-5}$ (0.000, 0.000) |
| <i>ZFH1B</i>            |       |   |     |     |     |       |                                     |
| Panda                   | 16014 | 2 | 83  | 96  | 105 | 0.94  | 0.331 (0.368, 0.662)                |
| Dog                     | 15918 | 4 | 109 | 89  | 112 | 2.02  | 0.155 (0.194, 0.465)                |
| Cow                     | 15427 | 0 | 119 | 92  | 112 | 3.45  | 0.063 (0.090, 0.310)                |
| Dolphin                 | 15228 | 2 | 121 | 88  | 109 | 5.21  | 0.022 (0.044, 0.132)                |
| <i>E. helvum</i>        | 16034 | 2 | 125 | 86  | 119 | 7.21  | 0.007 (0.023, 0.056)                |
| <i>P. vampyrus</i>      | 14687 | 1 | 121 | 85  | 110 | 6.29  | 0.012 (0.030, 0.084)                |
| <i>R. ferrumequinum</i> | 15959 | 3 | 98  | 90  | 113 | 0.34  | 0.560 (0.560, 0.662)                |
| <i>M. lyra</i>          | 15897 | 1 | 130 | 87  | 120 | 8.52  | 0.004 (0.020, 0.036)                |
| <i>M. lucifugus</i>     | 15872 | 3 | 146 | 91  | 110 | 12.76 | $4 \times 10^{-4}$ (0.004, 0.004)   |
| <i>P. parnellii</i>     | 16020 | 2 | 118 | 91  | 116 | 3.49  | 0.062 (0.090, 0.310)                |
| <i>ZIC1</i>             |       |   |     |     |     |       |                                     |
| Panda                   | 5952  | 2 | 44  | 68  | 76  | 5.14  | 0.023 (0.058, 0.161)                |
| Dog                     | 5958  | 2 | 39  | 67  | 76  | 7.40  | 0.007 (0.023, 0.056)                |
| Cow                     | 5382  | 4 | 75  | 62  | 67  | 1.23  | 0.267 (0.381, 1.000)                |



|                         |      |    |     |    |    |       |                                    |
|-------------------------|------|----|-----|----|----|-------|------------------------------------|
| Dolphin                 | 5788 | 4  | 93  | 67 | 69 | 4.22  | 0.040 (0.080, 0.240)               |
| <i>E. helvum</i>        | 5867 | 2  | 95  | 73 | 68 | 2.88  | 0.090 (0.150, 0.450)               |
| <i>P. vampyrus</i>      | 5756 | 2  | 80  | 68 | 73 | 0.97  | 0.324 (0.398, 1.000)               |
| <i>R. ferrumequinum</i> | 5878 | 4  | 67  | 67 | 72 | 0.00  | 1.000 (1.000, 1.000)               |
| <i>M. lyra</i>          | 4236 | 10 | 200 | 48 | 44 | 93.16 | <1x10 <sup>-5</sup> (0.000, 0.000) |
| <i>M. lucifugus</i>     | 5482 | 5  | 182 | 62 | 65 | 59.02 | <1x10 <sup>-5</sup> (0.000, 0.000) |
| <i>P. parnellii</i>     | 5820 | 5  | 77  | 66 | 73 | 0.85  | 0.358 (0.398, 1.000)               |
| ZIC2                    |      |    |     |    |    |       |                                    |
| Panda                   | 5486 | 5  | 81  | 61 | 90 | 2.82  | 0.093 (0.186, 0.558)               |
| Dog                     | 5495 | 6  | 67  | 59 | 92 | 0.51  | 0.476 (0.595, 1.000)               |
| Cow                     | 5365 | 5  | 115 | 65 | 83 | 13.89 | 2x10 <sup>-4</sup> (0.002, 0.002)  |
| Dolphin                 | 5256 | 2  | 87  | 63 | 80 | 3.84  | 0.050 (0.125, 0.350)               |
| <i>E. helvum</i>        | 5563 | 6  | 59  | 62 | 96 | 0.07  | 0.785 (0.785, 1.000)               |
| <i>P. vampyrus</i>      | 5162 | 3  | 37  | 51 | 80 | 2.23  | 0.136 (0.227, 0.680)               |
| <i>R. ferrumequinum</i> | 5456 | 7  | 61  | 56 | 95 | 0.21  | 0.644 (0.716, 1.000)               |
| <i>M. lyra</i>          | 5367 | 1  | 74  | 64 | 97 | 0.72  | 0.395 (0.564, 1.000)               |
| <i>M. lucifugus</i>     | 5514 | 4  | 94  | 62 | 97 | 6.56  | 0.010 (0.033, 0.080)               |
| <i>P. parnellii</i>     | 5410 | 4  | 111 | 63 | 94 | 13.24 | 3x10 <sup>-4</sup> (0.002, 0.003)  |

**Table S4**

**Name and functional information for the genes identified as being associated with ear development from literature surveys.** The associated CNEs of which were available from the CONDOR database. Gene names, with common synonyms, type of protein and broad region of expression are given, together with the mutant phenotype – typically in the mouse *Mus musculus* – unless otherwise stated. Abbreviations: TF – transcription factor; OHC – outer hair cells;

| Gene:                        | Type of gene/protein              | Expressed in:                                                             | Mutant phenotype / putative role in auditory system                                                       | Ref:     |
|------------------------------|-----------------------------------|---------------------------------------------------------------------------|-----------------------------------------------------------------------------------------------------------|----------|
| <i>ATBF1</i>                 | Zinc finger homeobox              | Developing otocyst                                                        | Direct target of Dlx5 in developing inner ear                                                             | [8]      |
| <i>BARHL2</i>                | Homeobox                          | All sensory HCs during development                                        | Age-related progressive OHC/IHC degeneration; maintenance of cochlear HCs                                 | [9]      |
| <i>BCL11A</i>                | Zinc finger TF                    | Ear pinna and inner ear                                                   | Possible role in regeneration of avian hair cells                                                         | [10, 11] |
| <i>BCL11B</i>                | Zinc finger TF                    | Ear pinna and inner ear, OHC                                              | Required for maintenance of OHCs and normal hearing                                                       | [10, 12] |
| <i>BHLHB5</i>                | Basic loop helix TF               | Epithelial layer of the cochlea                                           | Unknown                                                                                                   | [13, 14] |
| <i>DACH1</i>                 | Dachshund                         | Overlaps <i>Pax2</i> and <i>Eya1</i> in ear                               | No obvious ear defects                                                                                    | [15]     |
| <i>DLX1</i> ,<br><i>DLX2</i> | Homeobox                          | Maxillary and mandibular component of 1 <sup>st</sup> pharyngeal arch     | Defective malleus and incus                                                                               | [16]     |
| <i>EBF1</i>                  | TF                                | Developing otocyst                                                        | Interacts with Dlx5 in the developing inner ear                                                           | [8]      |
| <i>EMX2</i>                  | Homeobox                          | Otic vesicle, branchial arches and skeletogenic neural crest cells        | Middle-ear ossicles malformed<br>Anomalous hair cell numbers in cochlear duct<br>Shortened cochlear duct. | [17, 18] |
| <i>ESRRB</i>                 | Estrogen-related receptor         | Cochlea, developing inner ear                                             | Humans – DFNB35                                                                                           | [19]     |
| <i>EVII</i>                  | TF                                | Middle ear basal epithelial cells, fibroblasts, and neutrophil leukocytes | Inflammation of the middle ear                                                                            | [20]     |
| <i>EYA1</i>                  | Eyes absent ( <i>eya</i> ) family | Craniofacial mesenchyme                                                   | Homozygotes lack ears; Inner ear neurogenesis                                                             | [21, 22] |
| <i>FIGN</i>                  | AAA protein                       | Expressed widely                                                          | Reduced or absent semicircular canals                                                                     | [23]     |
| <i>FOXP1</i>                 | FOX family TF                     | Utricle and ampullae of semicircular canals                               | Unknown                                                                                                   | [11, 24] |
| <i>GBX2</i>                  | Homeobox                          | Inner-ear                                                                 | Absence of endolymphatic duct                                                                             | [25]     |

|                                                |                       |                                                                                                           |                                                                                                                                                                                                                                                                 |          |
|------------------------------------------------|-----------------------|-----------------------------------------------------------------------------------------------------------|-----------------------------------------------------------------------------------------------------------------------------------------------------------------------------------------------------------------------------------------------------------------|----------|
|                                                |                       |                                                                                                           | Swelling of membranous labyrinth<br>Absence of semicircular canals                                                                                                                                                                                              |          |
| <i>GLI3</i>                                    | C2H2-type zinc finger | Medial-ventral and lateral of otocyst, and surrounding mesenchyme                                         | Vestibular defects<br>Loss of lateral semicircular canal<br>Truncation or absence of anterior semicircular canal<br>Narrower posterior semicircular canal diameter<br>Smaller inner ears with widened endolymphatic ducts                                       | [26]     |
| <i>IRX1, 2 and 3 (IRX1/2/4 and IRX3/5/6)</i>   | Iroquois homeobox     | Complementary expression in inner ear, external ears                                                      | Speculatively:<br><i>Irx1</i> – semicircular canal formation<br><i>Irx2</i> – cochlea development<br><i>Irx3</i> – cochlea development, formation of VIII ganglion.                                                                                             | [27]     |
| <i>LHX1</i>                                    | LIM domain TF         | Saccule                                                                                                   | Possibly neuronal differentiation                                                                                                                                                                                                                               | [8, 24]  |
| <i>LMO1</i>                                    | LIM domain TF         | Vestibular and cochlear HCs, vestibular ganglia                                                           | Inner ear morphogenesis                                                                                                                                                                                                                                         | [28]     |
| <i>LMO4</i>                                    | LIM domain TF         | Semicircular canals, macula, crista, and spiral ganglia                                                   | Inner ear morphogenesis                                                                                                                                                                                                                                         | [28]     |
| <i>MAF</i>                                     | TF                    | Otic placodes                                                                                             | Unknown                                                                                                                                                                                                                                                         | [29]     |
| <i>MEIS1, MEIS2</i>                            | TALE homeobox TF      | Meis1 – lateral wall of growing cochlear duct<br>Meis2 – cells of developing acoustic-vestibular ganglion | Assigning regional identity in morphogenesis, patterning, and specification of developing inner ear                                                                                                                                                             | [30]     |
| <i>Nkx-5.1 (HMX2)</i><br><i>Nkx-5.2 (HMX3)</i> | Homeobox              | Early – dorso-lateral otic vesicle face<br>Later – entire dorsal otic vesicle                             | Hmx2 – lack semicircular ducts, loss of cristae and macula utriculus, fused utriculosaccular chamber<br>Hmx3 – gross structure not severely affected, loss of sensory cells<br>Hmx2:Hmx3 – significant anatomical and neurosensory defects in vestibular system | [31-33]  |
| <i>NR2F1 (COUP-TFI)</i>                        | TF                    | Early in developing otic vesicle; and maturing HCs and pillar cells                                       | Differentiation of hair cells and support cells in organ of Corti<br>KO – displaced HCs, shortened cochlear duct                                                                                                                                                | [34, 35] |
| <i>NR2F2 (COUP-TFII)</i>                       | TF                    | Early in developing otic vesicle                                                                          | Patterning and differentiation of cochlear structures                                                                                                                                                                                                           | [34]     |

|               |                    |                                                                                                      |                                                                                                                                                                                                                                                                                                                                                                                                                                                                                                                                                                            |          |
|---------------|--------------------|------------------------------------------------------------------------------------------------------|----------------------------------------------------------------------------------------------------------------------------------------------------------------------------------------------------------------------------------------------------------------------------------------------------------------------------------------------------------------------------------------------------------------------------------------------------------------------------------------------------------------------------------------------------------------------------|----------|
| <i>PAX2</i>   | Paired-box TF      | Medial wall of otic vesicle;<br>endolymphatic duct and sac; cochlea                                  | Rudimentary cochlea but severely malformed<br>Needed for organ of Corti formation                                                                                                                                                                                                                                                                                                                                                                                                                                                                                          | [36, 37] |
| <i>PAX3</i>   | Paired-box TF      | Neural tube, developing brain, neural<br>crest and derivatives                                       | Humans – Type 1 and 3 Waardenburg syndrome                                                                                                                                                                                                                                                                                                                                                                                                                                                                                                                                 | [38, 39] |
| <i>PAX5</i>   | Paired-box TF      | Overlaps <i>PAX2</i>                                                                                 | No obvious inner ear defects<br><i>Pax5</i> minigene can substituted for <i>Pax2</i>                                                                                                                                                                                                                                                                                                                                                                                                                                                                                       | [37, 40] |
| <i>PAX7</i>   | Paired-box TF      | Various                                                                                              | <i>Pax7</i> descendants contribute to ear tissues                                                                                                                                                                                                                                                                                                                                                                                                                                                                                                                          | [41]     |
| <i>PAX8</i>   | Paired-box TF      | Early in developing otic placode                                                                     | No detectable morphological defect in null mice                                                                                                                                                                                                                                                                                                                                                                                                                                                                                                                            | [37]     |
| <i>POU3F3</i> | POU class homeobox | Supporting cells and mesenchymal<br>cells of cochlea                                                 | No detectable embryonic morphological defects<br>Possible roles in maintenance or functional development<br>of postnatal cochlea                                                                                                                                                                                                                                                                                                                                                                                                                                           | [42]     |
| <i>SALL3</i>  | TF                 | Otic vesicles                                                                                        | Deletion may lead to deafness in humans                                                                                                                                                                                                                                                                                                                                                                                                                                                                                                                                    | [43]     |
| <i>SHH</i>    | Hedgehog           | Strongly expressed in ventral midline<br>structures, floor plate, and notochord,<br>but not otocyst. | Deformed inner-ear and surrounding capsule<br>Regulation of chondrogenesis                                                                                                                                                                                                                                                                                                                                                                                                                                                                                                 | [26, 44] |
| <i>SHOX</i>   | Homeobox           | 1 <sup>st</sup> and 2 <sup>nd</sup> pharyngeal arches                                                | Possibly associated with hearing defects seen in Turner<br>syndrome                                                                                                                                                                                                                                                                                                                                                                                                                                                                                                        | [45]     |
| <i>SHOX2</i>  | Homeobox           | 1 <sup>st</sup> and 2 <sup>nd</sup> pharyngeal arches                                                | Unknown                                                                                                                                                                                                                                                                                                                                                                                                                                                                                                                                                                    | [45]     |
| <i>SOX2</i>   | Sox family         | Neural tube and otocyst                                                                              | Absence ( <i>Lcc/Lcc</i> ) deaf, hair cells do not differentiate<br>and severe inner ear malformation. All 3 ampullae<br>missing and rudimentary development of semicircular<br>canals showed. Cochlea undercoiled, extremely small<br>sacculle and utricle.<br>Reduced expression ( <i>Ysb/Ysb</i> ) severely hearing<br>impaired, sensory epithelium abnormal development,<br>disorganized and fewer hair cells. 2 ampullae missing and<br>truncated semicircular canals. Cochlea slightly<br>undercoiled.<br><i>Ysb/Lcc</i> inner-ears displayed intermediate phenotype | [46]     |
| <i>SOX3</i>   | Sox family         | Expressed with <i>SOX2</i> in neurogenic<br>domain of otic cup                                       | Possibly involved in the generation of neurons (chick)                                                                                                                                                                                                                                                                                                                                                                                                                                                                                                                     | [47]     |

|                                                        |                             |                                                                                 |                                                                                     |      |
|--------------------------------------------------------|-----------------------------|---------------------------------------------------------------------------------|-------------------------------------------------------------------------------------|------|
| <i>SOX6</i>                                            | Sox family                  | Otic vesicle                                                                    | Co-expressed with <i>Fgf-3</i>                                                      | [48] |
| <i>SOX21</i>                                           | Sox family                  | Sensory epithelium in early otocyst stage, later restricted to supporting cells | Mild hearing impairment<br>Malformed hair cells                                     | [49] |
| <i>TFAP2A</i>                                          | TF                          | Neural crest cell lineages                                                      | Mutation associated with sensorineural deafness and inner ear malformation          | [50] |
| <i>TSHZ1</i>                                           | Putative zinc fingers<br>TF | Branchial arches                                                                | Malformations of the middle ear components, including the malleus and tympanic ring | [51] |
| <i>ZFHX1B</i>                                          | Zinc finger TF              | Regenerating cochlea                                                            | Unknown                                                                             | [11] |
| <i>ZIC family</i><br>(1, 2, 4, 5)<br><i>ZIC1, ZIC2</i> | Zinc-finger TF              | Chick developing inner-ear, hindbrain, neural crest, and periotic mesenchyme    | Unknown                                                                             | [52] |

**Table S5****Gene abbreviations and EntrezGene identification numbers for the ear development and****'hearing/deafness' genes with putative associated CNEs examined by this study: Genes**

are broadly defined by three categories: NSHL – non-syndromic hearing loss; SHL – syndromic hearing loss; DEV – involved in auditory system development. Abbreviations: NA – not available. Cetacean and bat numbers correspond to the genes placement in Figure 5.

\* Also see: Curtain MM; Donahue LR. 2007. A possible new mutation to Mmp14 MGI Direct Data Submission

| Gene name:                    | EntrezGene ID: | Category: | Cetacean | Bat | Source: |
|-------------------------------|----------------|-----------|----------|-----|---------|
| <i>ADCY1</i>                  | 107            | NSHL      | 1        | NA  | [53]    |
| <i>AGC1</i>                   | 176            | DEV       | 2        | 1   | [54]    |
| <i>ALCAM</i>                  | 214            | DEV       | 3        | 2   | [54]    |
| <i>ATBF1 (ZFHX3)</i>          | 463            | DEV       | 4        | 3   | [8]     |
| <i>ATOH1 (HATH1)</i>          | 474            | DEV       | 5        | 4   | [55]    |
| <i>BARHL2</i>                 | 343472         | DEV       | 6        | 5   | [9]     |
| <i>BCL11A</i>                 | 53335          | DEV       | 7        | 6   | [10]    |
| <i>BDNF</i>                   | 627            | DEV       | 8        | 7   | [56]    |
| <i>BHLHB5 (BHLHE22)</i>       | 27319          | DEV       | 9        | 8   | [13]    |
| <i>BMP4</i>                   | 652            | DEV       | 10       | 9   | [57]    |
| <i>CDH11</i>                  | 1009           | DEV       | 11       | 10  | [54]    |
| <i>CDH23</i>                  | 64072          | NSHL/SHL  | 12       | 11  | [53]    |
| <i>CHD7</i>                   | 55636          | SHL       | 13       | 12  | [53]    |
| <i>CLIC5</i>                  | 53405          | NSHL      | 14       | 13  | [53]    |
| <i>COCH</i>                   | 1690           | NSHL      | 15       | 14  | [53]    |
| <i>COL11A1</i>                | 1301           | SHL       | 16       | 15  | [53]    |
| <i>COL12A1</i>                | 1303           | DEV       | 17       | 16  | [54]    |
| <i>COL2A1</i>                 | 1280           | DEV       | 18       | 17  | [54]    |
| <i>COL4A3</i>                 | 1285           | SHL       | NA       | 18  | [53]    |
| <i>COL4A4</i>                 | 1286           | SHL       | 19       | 19  | [53]    |
| <i>COL9A1</i>                 | 1297           | SHL       | 20       | 20  | [53]    |
| <i>DACHI</i>                  | 1602           | DEV       | 21       | 21  | [15]    |
| <i>DFNB31 (WHRN)</i>          | 25861          | NSHL/SHL  | 22       | 22  | [53]    |
| <i>DIAPH1 (HDIA1)</i>         | 1729           | NSHL      | 23       | 23  | [53]    |
| <i>DIO2</i>                   | 1734           | DEV       | 24       | 24  | [58]    |
| <i>DKFZp686I0554 (RGS7BP)</i> | 401190         | Unclear   | 25       | 25  | [59]    |
| <i>DLX1</i>                   | 1745           | DEV       | 26       | 26  | [16]    |
| <i>DLX2</i>                   | 1746           | DEV       | 27       | 27  | [16]    |
| <i>DSPP</i>                   | 1834           | NSHL      | NA       | 28  | [60]    |
| <i>EBF (EBF1)</i>             | 1879           | DEV       | 28       | 29  | [8]     |
| <i>EDNI</i>                   | 1906           | DEV       | 29       | 30  | [56]    |
| <i>EDNRA</i>                  | 1909           | DEV       | 30       | 31  | [56]    |
| <i>EDNRB</i>                  | 1910           | SHL       | 31       | 32  | [53]    |
| <i>EIF3S3 (EIF3H)</i>         | 8667           | DEV       | 32       | 33  | [54]    |
| <i>EMX2</i>                   | 2018           | DEV       | 33       | 34  | [17]    |
| <i>ENTPD1 (Cd39)</i>          | 953            | DEV       | 34       | 35  | [61]    |
| <i>EPS8</i>                   | 2059           | NSHL      | 35       | 36  | [53]    |
| <i>EVII (MECOM)</i>           | 2122           | DEV       | 36       | 37  | [20]    |
| <i>EYA1</i>                   | 2138           | NSHL      | 37       | 38  | [53]    |
| <i>EYA4</i>                   | 2070           | NSHL      | 38       | 39  | [53]    |

|                                          |        |          |    |    |          |
|------------------------------------------|--------|----------|----|----|----------|
| <i>FGFR1</i>                             | 2260   | DEV      | 39 | 40 | [62, 63] |
| <i>FIGN</i>                              | 55137  | DEV      | 40 | 41 | [23]     |
| <i>FLNB</i>                              | 2317   | DEV      | 41 | 42 | [54]     |
| <i>FOXP1</i>                             | 27086  | DEV      | 42 | 43 | [11]     |
| <i>GAS1</i>                              | 2619   | DEV      | 43 | 44 | [64]     |
| <i>GLI3</i>                              | 2737   | DEV      | 44 | 45 | [26]     |
| <i>HGF</i>                               | 3082   | NSHL     | 45 | 46 | [53]     |
| <i>HOXA2</i>                             | 3199   | DEV      | 46 | 47 | [56]     |
| <i>HOXB1</i>                             | 3211   | DEV      | 47 | 48 | [56]     |
| <i>IRX3</i>                              | 79191  | DEV      | 48 | 49 | [27]     |
| <i>KCNE4 (ISK)</i>                       | 23704  | SHL      | 49 | 50 | [53]     |
| <i>KCNQ4</i>                             | 9132   | NSHL     | 50 | 51 | [53]     |
| <i>KCTD12 (KIAA1778, C13orf2, PFET1)</i> | 115207 | Unclear  | 51 | 52 | [65]     |
| <i>KIT (CKIT)</i>                        | 3815   | DEV      | 52 | 53 | [56]     |
| <i>KITLG (MGF)</i>                       | 4254   | DEV      | 53 | 54 | [56]     |
| <i>LARS2</i>                             | 23395  | SHL      | 54 | 55 | [53]     |
| <i>LHX1</i>                              | 3975   | DEV      | 55 | 56 | [24]     |
| <i>LMO1</i>                              | 4004   | DEV      | 56 | 57 | [28]     |
| <i>LMO4</i>                              | 8543   | DEV      | 57 | 58 | [28]     |
| <i>LOC253827 (MSRB3)</i>                 | 253827 | NSHL     | 58 | 59 | [53]     |
| <i>LOC340784 (HMX3)</i>                  | 340784 | DEV      | 59 | 60 | [31]     |
| <i>LOC389207 (GRXCR1)</i>                | 389207 | NSHL     | 60 | 61 | [53]     |
| <i>MAF</i>                               | 4094   | DEV      | 61 | 62 | [29]     |
| <i>MAFB</i>                              | 9935   | DEV      | 62 | 63 | [56]     |
| <i>MASS1 (SLC4A11)</i>                   | 83959  | SHL      | NA | 64 | [66]     |
| <i>MEIS1</i>                             | 4211   | DEV      | 64 | 65 | [30]     |
| <i>MEIS2</i>                             | 4212   | DEV      | 65 | 66 | [30]     |
| <i>MITF</i>                              | 4286   | SHL      | 66 | 67 | [53]     |
| <i>MMP14*</i>                            | 4323   | Unclear  | 67 | NA | [6]      |
| <i>MYH14</i>                             | 79784  | NSHL     | 68 | NA | [53]     |
| <i>MYO1C</i>                             | 4641   | NSHL     | 69 | 68 | [67]     |
| <i>MYO3A</i>                             | 53904  | NSHL     | 70 | 69 | [53]     |
| <i>MYO6</i>                              | 4646   | NSHL     | 71 | 70 | [53]     |
| <i>NEUROG1</i>                           | 4762   | DEV      | 72 | 71 | [56]     |
| <i>NOX3</i>                              | 50508  | DEV      | 73 | 72 | [68]     |
| <i>NR2F1</i>                             | 7025   | DEV      | 74 | 73 | [34]     |
| <i>NR2F2</i>                             | 7026   | DEV      | 75 | NA | [34]     |
| <i>NR3C2 (MLR)</i>                       | 4306   | DEV      | 76 | 74 | [69]     |
| <i>NTRK2 (TRKB)</i>                      | 4915   | DEV      | 77 | 75 | [56]     |
| <i>OPA1</i>                              | 4976   | SHL      | 78 | 76 | [70]     |
| <i>OTOF</i>                              | 9381   | NSHL     | 79 | NA | [53]     |
| <i>OTOG</i>                              | 340990 | NSHL     | 80 | NA | [53]     |
| <i>OTOR</i>                              | 56914  | NSHL     | 81 | 77 | [53]     |
| <i>OTX1</i>                              | 5013   | DEV      | 82 | 78 | [56]     |
| <i>OTX2</i>                              | 5015   | DEV      | 83 | 79 | [56]     |
| <i>PAX2</i>                              | 5076   | DEV      | 84 | 80 | [37]     |
| <i>PAX3</i>                              | 5077   | SHL      | 85 | 81 | [53]     |
| <i>PAX5</i>                              | 5079   | DEV      | 86 | 82 | [37]     |
| <i>PAX8</i>                              | 7849   | DEV      | 87 | 83 | [37]     |
| <i>PCDH15</i>                            | 65217  | NSHL/SHL | 88 | 84 | [53]     |

|                            |        |          |     |     |      |
|----------------------------|--------|----------|-----|-----|------|
| <i>PCTK2 (CDK17)</i>       | 5128   | DEV      | 89  | 85  | [54] |
| <i>PDE4B</i>               | 5142   | DEV      | 90  | 86  | [54] |
| <i>POU3F3</i>              | 5455   | DEV      | 91  | NA  | [42] |
| <i>POU4F3</i>              | 5456   | NSHL     | 92  | 87  | [53] |
| <i>PRES (SLC26A5)</i>      | 375611 | NSHL     | 93  | 88  | [53] |
| <i>PRRX1 (PRX1)</i>        | 5396   | DEV      | 94  | 89  | [56] |
| <i>RARA</i>                | 5914   | DEV      | 95  | 90  | [56] |
| <i>RARG</i>                | 5916   | DEV      | 96  | 91  | [56] |
| <i>RDX</i>                 | 5962   | NSHL     | 97  | 92  | [53] |
| <i>SALL1</i>               | 6299   | SHL      | 98  | 93  | [71] |
| <i>SEMA3E</i>              | 9723   | SHL      | 99  | 94  | [53] |
| <i>SHOX2</i>               | 6474   | DEV      | 100 | 95  | [45] |
| <i>SIX1</i>                | 6495   | NSHL     | 101 | NA  | [53] |
| <i>SIX5</i>                | 147912 | SHL      | NA  | 96  | [53] |
| <i>SLC26A4</i>             | 5172   | NSHL/SHL | 102 | 97  | [53] |
| <i>SOX2</i>                | 6657   | DEV      | 103 | 98  | [46] |
| <i>SOX6</i>                | 55553  | DEV      | 104 | 99  | [48] |
| <i>SPRY2</i>               | 10253  | DEV      | 105 | 100 | [72] |
| <i>TBX1</i>                | 6899   | DEV      | 106 | 101 | [73] |
| <i>TCOF1</i>               | 6949   | SHL      | 107 | 102 | [53] |
| <i>TECTA</i>               | 7007   | NSHL     | 108 | 103 | [53] |
| <i>TGFB2</i>               | 7042   | DEV      | 109 | 104 | [56] |
| <i>TJP2</i>                | 9414   | NSHL     | 110 | 105 | [53] |
| <i>TMC1</i>                | 117531 | NSHL     | 111 | 106 | [53] |
| <i>TRPA1</i>               | 8989   | DEV      | 112 | 107 | [74] |
| <i>TWIST1</i>              | 7291   | DEV      | 113 | 108 | [75] |
| <i>USH2A</i>               | 7399   | SHL      | 114 | 109 | [53] |
| <i>USH3A (CLRN1, USH3)</i> | 7401   | SHL      | 115 | 110 | [53] |
| <i>ZFHX1B (ZEB2)</i>       | 9839   | DEV      | 116 | 111 | [11] |
| <i>ZIC1</i>                | 7545   | DEV      | 117 | 112 | [52] |
| <i>ZIC2</i>                | 7546   | DEV      | 118 | 113 | [52] |



**Table S5**

**(a) Sequence information for the four primer pairs used to amplify specific CNEs located in the *Hmx2/3* gene region.** Primers were based on alignments of CNEs downloaded from the CONDOR database, and the flanking genomic regions from *Myotis lucifugus*, *Equus caballus*, *Felis catus*, *Canis familiaris*, *Bos taurus*, *Homo sapiens*, *Oryctolagus cuniculus* and *Mus musculus* downloaded from GenBank, primers were constructed under the default settings of ‘Primer3’, and adjusted using ambiguity bases where necessary.

| Primer:     | Amplifies:    | Primer sequence:        |
|-------------|---------------|-------------------------|
| Hmx2_9707_F | CRCNE00009707 | TGGCAGTTGCTAACCATTACA   |
| Hmx2_9707_R | CRCNE00009707 | GATTCYGGTCATGAGTGARG    |
| Hmx2_9711_F | CRCNE00009711 | TGACGAATCTTAAAACGGATTG  |
| Hmx2_9711_R | CRCNE00009711 | GCCTGGAAAATGGAGGAGAT    |
| Hmx2_9741_F | CRCNE00009741 | CCANGAGCAGTTGGAAASTT    |
| Hmx2_9741_R | CRCNE00009741 | TAAGTGTRCYTTTCRACACRTTG |
| Hmx2_9716_F | CRCNE00009716 | TRCAMGCATCAGATTTTCAT    |
| Hmx2_9716_R | CRCNE00009716 | CAAATGACATCTCRCAATRG    |

**(b) Final species coverage for the four amplified CNEs located in the *Hmx2/3* gene region.** Ensembl – data from genomic data downloaded from Ensembl [1]; genome – data from published genomes [3]; – – data missing; GenBank accession numbers are given for newly generated sequences >200bp; NA – sequence not submitted to GenBank, but has been deposited in the Dryad Repository: <http://dx.doi.org/10.5061/dryad.50kd5>

| Family            | Species                         | 9707    | 9711     | 9716     | 9741     |
|-------------------|---------------------------------|---------|----------|----------|----------|
| Ornithorhynchidae | <i>Ornithorhynchus anatinus</i> | Ensembl | Ensembl  | –        | Ensembl  |
| Phascolarctidae   | <i>Phascolarctos cinereus</i>   | –       | KM981808 | –        | KP017254 |
| Didelphidae       | <i>Monodelphis domestica</i>    | Ensembl | Ensembl  | –        | Ensembl  |
| Macropodidae      | <i>Macropus eugenii</i>         | –       | Ensembl  | –        | Ensembl  |
| Dasypodidae       | <i>Dasypus novemcinctus</i>     | Ensembl | Ensembl  | –        | Ensembl  |
| Megalonychidae    | <i>Choloepus hoffmanni</i>      | Ensembl | Ensembl  | –        | Ensembl  |
| Elephantidae      | <i>Loxodonta africana</i>       | Ensembl | Ensembl  | Ensembl  | Ensembl  |
| Tenrecidae        | <i>Echinops telfairi</i>        | Ensembl | Ensembl  | –        | –        |
| Procaviidae       | <i>Procavia capensis</i>        | Ensembl | –        | –        | Ensembl  |
| Erinaceidae       | <i>Erinaceus europaeus</i>      | Ensembl | –        | –        | Ensembl  |
| Soricidae         | <i>Sorex araneus</i>            | –       | –        | –        | Ensembl  |
| Pteropodidae      | <i>Macroglossus minimus</i>     | NA      | KM981782 | –        | KM981848 |
|                   | <i>Cynopterus brachyotis</i>    | –       | KM981785 | KM981816 | KM981840 |
|                   | <i>Cynopterus sphinx</i>        | –       | –        | –        | KM981841 |
|                   | <i>Dobsonia viridis</i>         | –       | KM981788 | KM981815 | KM981842 |
|                   | <i>Eidolon helvum</i>           | genome  | genome   | genome   | genome   |
|                   | <i>Pteropus rodricensis</i>     | –       | KM981784 | KM981814 | KM981863 |
|                   | <i>Pteropus</i> sp.             | NA      | –        | –        | KM981862 |
|                   | <i>Pteropus vampyrus</i>        | Ensembl | Ensembl  | –        | Ensembl  |
|                   | <i>Rousettus leschenaulti</i>   | –       | –        | –        | KM981857 |
| Rhinolophidae     | <i>Rhinolophus borneensis</i>   | –       | –        | KM981809 | KM981859 |

|                  |                                  |          |          |          |          |
|------------------|----------------------------------|----------|----------|----------|----------|
|                  | <i>Rhinolophus creaghi</i>       | KM981771 | KM981779 | –        | –        |
|                  | <i>Rhinolophus ferrumequinum</i> | genome   | genome   | genome   | genome   |
| Hipposideridae   | <i>Hipposideros cervinus</i>     | KM981772 | KM981780 | KM981810 | KM981845 |
|                  | <i>Hipposideros ridleyi</i>      | NA       | KM981781 | KM981811 | KM981844 |
| Megadermatidae   | <i>Megaderma lyra</i>            | –        | –        | –        | KM981850 |
|                  | <i>Megaderma spasma</i>          | NA       | KM981783 | KM981813 | KM981849 |
| Rhinopomatidae   | <i>Rhinopoma hardwickii</i>      | –        | –        | KM981812 | KM981858 |
| Mormoopidae      | <i>Pteronotus parnellii</i>      | genome   | genome   | –        | genome   |
| Phyllostomidae   | <i>Carollia perspicillata</i>    | KM981773 | KM981786 | KM981823 | KM981838 |
| Vespertilionidae | <i>Kerivoula hardwickii</i>      | KM981776 | KM981789 | KM981817 | –        |
|                  | <i>Kerivoula minuta</i>          | –        | KM981791 | –        | –        |
|                  | <i>Kerivoula pellucida</i>       | NA       | KM981790 | KM981818 | –        |
|                  | <i>Plecotus auritus</i>          | –        | –        | KM981819 | –        |
|                  | <i>Myotis lucifugus</i>          | Ensembl  | Ensembl  | Ensembl  | Ensembl  |
|                  | <i>Murina cyclotis</i>           | KM981774 | KM981792 | KM981822 | KM981854 |
|                  | <i>Murina rozendaali</i>         | –        | KM981793 | KM981820 | KM981853 |
|                  | <i>Murina suilla</i>             | KM981775 | KM981794 | KM981821 | –        |
| Nycteridae       | <i>Nycteris tragata</i>          | –        | KM981787 | KM981824 | KM981855 |
| Camelidae        | <i>Camelus bactrianus</i>        | –        | KM981796 | KM981825 | KM981837 |
|                  | <i>Vicugna pacos</i>             | –        | Ensembl  | –        | Ensembl  |
| Bovidae          | <i>Bos taurus</i>                | Ensembl  | Ensembl  | Ensembl  | Ensembl  |
|                  | <i>Tragelaphus eurycerus</i>     | KM981778 | KM981802 | KM981827 | KM981860 |
|                  | <i>Eudorcas thomsonii</i>        | –        | KM981801 | KM981828 | KM981843 |
|                  | <i>Ovis aries</i>                | Ensembl  | –        | –        | –        |
| Suidae           | <i>Sus scrofa</i>                | Ensembl  | Ensembl  | Ensembl  | Ensembl  |
| Balaenopteridae  | <i>Megaptera novaeangliae</i>    | –        | KM981798 | KM981834 | KM981851 |
| Ziphiidae        | <i>Hyperoodon ampullatus</i>     | NA       | KM981800 | –        | –        |
|                  | <i>Ziphius cavirostris</i>       | KM981777 | KM981797 | KM981833 | KM981864 |
| Delphinidae      | <i>Tursiops truncatus</i>        | Ensembl  | Ensembl  | Ensembl  | Ensembl  |
|                  | <i>Orcinus orca</i>              | NA       | KM981799 | KM981835 | KM981856 |
| Ursidae          | <i>Ailuropoda melanoleuca</i>    | Ensembl  | Ensembl  | –        | Ensembl  |
| Felidae          | <i>Felis catus</i>               | Ensembl  | Ensembl  | –        | Ensembl  |
| Herpestidae      | <i>Suricata suricatta</i>        | –        | KM981804 | –        | KM981861 |
| Hyaenidae        | <i>Hyaena brunnea</i>            | –        | KM981803 | KM981830 | KM981846 |
| Canidae          | <i>Canis familiaris</i>          | Ensembl  | Ensembl  | –        | Ensembl  |
| Mustelidae       | <i>Meles meles</i>               | –        | KM981805 | KM981831 | KM981852 |
| Equidae          | <i>Equus caballus</i>            | Ensembl  | Ensembl  | –        | Ensembl  |
| Tupaiaidae       | <i>Tupaia belangeri</i>          | Ensembl  | Ensembl  | Ensembl  | Ensembl  |
| Hominidae        | <i>Homo sapiens</i>              | Ensembl  | Ensembl  | Ensembl  | Ensembl  |
|                  | <i>Gorilla gorilla</i>           | Ensembl  | Ensembl  | –        | Ensembl  |
|                  | <i>Pan troglodytes</i>           | Ensembl  | Ensembl  | –        | Ensembl  |
|                  | <i>Pongo abelii</i>              | Ensembl  | Ensembl  | –        | Ensembl  |
| Hylobatidae      | <i>Nomascus leucogenys</i>       | Ensembl  | Ensembl  | –        | Ensembl  |
| Cercopithecidae  | <i>Macaca mulatta</i>            | Ensembl  | Ensembl  | –        | Ensembl  |
|                  | <i>Papio hamadryas</i>           | Ensembl  | Ensembl  | Ensembl  | Ensembl  |
| Cebidae          | <i>Callithrix jacchus</i>        | Ensembl  | Ensembl  | Ensembl  | Ensembl  |
| Galagidae        | <i>Otolemur garnettii</i>        | Ensembl  | Ensembl  | –        | Ensembl  |

|                |                                      |         |          |          |          |
|----------------|--------------------------------------|---------|----------|----------|----------|
| Cheirogaleidae | <i>Microcebus murinus</i>            | Ensembl | Ensembl  | Ensembl  | Ensembl  |
| Tarsiidae      | <i>Tarsius syrichta</i>              | Ensembl | –        | Ensembl  | Ensembl  |
| Leporidae      | <i>Lepus europaeus</i>               | –       | KM981795 | KM981829 | KM981847 |
|                | <i>Oryctolagus cuniculus</i>         | Ensembl | Ensembl  | –        | Ensembl  |
| Ochotonidae    | <i>Ochotona princeps</i>             | Ensembl | Ensembl  | Ensembl  | Ensembl  |
| Muridae        | <i>Mus musculus</i>                  | Ensembl | Ensembl  | Ensembl  | Ensembl  |
|                | <i>Rattus norvegicus</i>             | Ensembl | Ensembl  | Ensembl  | Ensembl  |
| Heteromyidae   | <i>Dipodomys ordii</i>               | Ensembl | Ensembl  | –        | –        |
| Sciuridae      | <i>Callosciurus notatus</i>          | NA      | KM981806 | KM981832 | KM981836 |
|                | <i>Spermophilus tridecemlineatus</i> | Ensembl | Ensembl  | –        | –        |
| Cricetidae     | <i>Clethrionomys glareolus</i>       | –       | KM981807 | KM981826 | KM981839 |
| Caviidae       | <i>Cavia porcellus</i>               | Ensembl | Ensembl  | Ensembl  | Ensembl  |

## References:

1. Flicek P, Ahmed I, Amode MR, Barrell D, Beal K, Brent S, Carvalho-Silva D, Clapham P, Coates G, Fairley S, Fitzgerald S, Gil L, Garcia-Girón C, Gordon L, Hourlier T, Hunt S, Juettemann T, Kähäri A, Keenan S, Komorowska M, Kulesha E, Longden I, Maurel T, McLaren W, Muffato M, Nag R, Overduin B, Pignatelli M, Pritchard B, Pritchard E, et al: **Ensembl 2013**. *Nucleic Acids Res* 2013, **41**:D48–D55.
2. Woolfe A, Goode DK, Cooke J, Callaway H, Smith S, Snell P, McEwen GK, Elgar G: **CONDOR: a database resource of developmentally associated conserved non-coding elements**. *BMC Dev Biol* 2007, **7**:100.
3. Tsagkogeorga G, Parker J, Stupka E, Cotton JA, Rossiter SJ: **Phylogenomic analyses elucidate the evolutionary relationships of bats**. *Curr Biol* 2013, **23**:2262–2267.
4. Zhang G, Cowled C, Shi Z, Huang Z, Bishop-Lilly KA, Xiaodong F, Wynne JW, Xiong Z, Baker ML, Zhao W, Tachedjian M, Zhu Y, Zhou P, Jiang X, Ng J, Yang L, Wu L, Xiao J, Feng Y, Chen Y, Sun X, Zhang Y, Marsh GA, Cramer G, Broder CC, Frey KG, Wang L-F, Wang J: **Comparative analysis of bat genomes provides insight into the evolution of flight and immunity**. *Science* 2013, **339**:456–460.
5. Yim H-S, Cho YS, Guang X, Kang SG, Jeong J-Y, Cha S-S, Oh H-M, Lee J-H, Yang EC, Kwon KK, Kim YJ, Kim TW, Kim W, Jeon JH, Kim S-J, Choi DH, Jho S, Kim H-M, Ko J, Kim H, Shin Y-A, Jung H-J, Zheng Y, Wang Z, Chen Y, Chen M, Jiang A, Li E, Zhang S, Hou H, et al: **Minke whale genome and aquatic adaptation in cetaceans**. *Nat Genet* 2014, **46**:88–92.
6. Zhou X, Sun F, Xu S, Fan G, Zhu K, Liu X, Chen Y, Shi C, Yang Y, Huang Z, Chen J, Hou H, Guo X, Chen W, Chen Y, Wang X, Lv T, Yang D, Zhou J, Huang B, Wang Z, Zhao W, Tian R, Xiong Z, Xu J, Liang X, Chen B, Liu W, Wang J, Pan S, Fang X, Li M, Wei F, Xu X, Zhou K, Wang J, Yang G: **Baiji genomes reveal low genetic variability and new insights into secondary aquatic adaptations**. *Nat Commun* 2013, **4**: 2708.
7. Kent WJ, Sugnet CW, Furey TS, Roskin KM, Pringle TH, Zahler AM, Haussler D: **The human genome browser at UCSC**. *Genome Res* 2002, **12**:996–1006.
8. Sajan SA, Rubenstein JL, Warchol ME, Lovett M: **Identification of direct downstream targets of Dlx5 during early inner ear development**. *Hum Mol Genet* 2011, **20**:1262–1273.
9. Li S, Price SM, Cahill H, Ryugo DK, Shen MM, Xiang M: **Hearing loss caused by progressive degeneration of cochlear hair cells in mice deficient for the *Barhl1* homeobox gene**. *Development* 2002, **129**:3523–3532.
10. Lee SC: **Characterisation of BCL11 functions in development using genetically modified mice**. University of Cambridge, The Wellcome Trust Sanger Institute, 2008.
11. Hawkins RD, Bashiardes S, Powder KE, Sajan SA, Bhonagiri V, Alvarado DM, Speck J, Warchol ME, Lovett M: **Large scale gene expression profiles of regenerating inner ear sensory epithelia**. *PLoS ONE* 2007, **2**:e525.
12. Okumura H, Miyasaka Y, Morita Y, Nomura T, Mishima Y, Takahashi S, Kominami R: ***Bcl11b* heterozygosity leads to age-related hearing loss and degeneration of outer hair cells of the mouse cochlea**. *Exp Anim* 2011, **60**:355–361.
13. Brunelli S, Innocenzi A, Cossu G: ***Bhlhb5* is expressed in the CNS and sensory organs during mouse embryonic development**. *Gene Expr Patterns* 2003, **3**:755–759.
14. Fritsch B, Eberl DF, Beisel KW: **The role of bHLH genes in ear development and evolution: revisiting a 10-year-old hypothesis**. *Cell Mol Life Sci* 2010, **67**:3089–3099.
15. Heanue TA, Davis RJ, Rowitch DH, Kispert A, McMahon AP, Mardon G, Tabin CJ: ***Dach1*, a vertebrate homologue of *Drosophila* dachshund, is expressed in the**

- developing eye and ear of both chick and mouse and is regulated independently of *Pax* and *Eya* genes. *Mech Dev* 2002, **111**:75–87.
16. Merlo GR, Zerega B, Paleari L, Trombino S, Mantero S, Levi G: **Multiple functions of *Dlx* genes.** *Int J Dev Biol* 2000, **44**:619–626.
  17. Rhodes CR, Parkinson N, Tsai H, Brooker D, Mansell S, Spurr N, Hunter AJ, Steel KP, Brown SDM: **The homeobox gene *Emx2* underlies middle ear and inner ear defects in the deaf mouse mutant pardon.** *J Neurocytol* 2003, **32**:1143–1154.
  18. Holley M, Rhodes C, Kneebone A, Herde MK, Fleming M, Steel KP: ***Emx2* and early hair cell development in the mouse inner ear.** *Dev Biol* 2010, **340**:547–556.
  19. Collin RWJ, Kalay E, Tariq M, Peters T, van der Zwaag B, Venselaar H, Oostrik J, Lee K, Ahmed ZM, Caylan R, Li Y, Spierenburg HA, Eyupoglu E, Heister A, Riazuddin S, Bahat E, Ansar M, Arslan S, Wollnik B, Brunner HG, Cremers CWRJ, Karaguzel A, Ahmad W, Cremers FPM, Vriend G, Friedman TB, Riazuddin S, Leal SM, Kremer H: **Mutations of *ESRRB* encoding estrogen-related receptor beta cause autosomal-recessive nonsyndromic hearing impairment DFNB35.** *Am J Hum Genet* 2008, **82**:125–138.
  20. Parkinson N, Hardisty-Hughes RE, Tateossian H, Tsai H-T, Brooker D, Morse S, Lalane Z, MacKenzie F, Fray M, Glenister P, Woodward A-M, Polley S, Barbaric I, Dear N, Hough TA, Hunter AJ, Cheeseman MT, Brown SDM: **Mutation at the *Evi1* locus in Junbo mice causes susceptibility to otitis media.** *PLoS Genet* 2006, **2**:1556–1564.
  21. Xu PX, Adams J, Peters H, Brown MC, Heaney S, Mass R: ***Eya1*-deficient mice lack ears and kidneys and show abnormal apoptosis of organ primordia.** *Nat Genet* 1999, **23**:113–117.
  22. Ahmed M, Xu J, Xu PX: **EYA1 and SIX1 drive the neuronal developmental program in cooperation with the SWI/SNF chromatin-remodeling complex and SOX2 in the mammalian inner ear.** *Development* 2012, **139**:1965–1977.
  23. Cox GA, Mahaffey CL, Nystuen A, Letts VA, Frankel WN: **The mouse fidgetin gene defines a new role for AAA family proteins in mammalian development.** *Nat Genet* 2000, **26**:198–202.
  24. Sajan SA, Warchol ME, Lovett M: **Towards a systems biology of mouse inner ear organogenesis: gene expression pathways, patterns and network analysis.** *Genetics* 2007, **177**:631–653.
  25. Lin Z, Cantos R, Patente M, Wu DK: ***Gbx2* is required for the morphogenesis of the mouse inner ear: a downstream candidate of hindbrain signaling.** *Development* 2005, **132**:2309–2318.
  26. Bok J, Dolson DK, Hill P, Ruther U, Epstein DJ, Wu DK: **Opposing gradients of *Gli* repressor and activators mediate *Shh* signaling along the dorsoventral axis of the inner ear.** *Development* 2007, **134**:1713–1722.
  27. Bosse A, Zülch A, Becker M-B, Torres M, Gómez-Skarmeta J, Modolell J, Gruss P: **Identification of the vertebrate *Iroquois* homeobox gene family with overlapping expression during early development of the nervous system.** *Mech Dev* 1997, **69**:169–181.
  28. Deng M, Pan L, Xie X, Gan L: **Differential expression of LIM domain-only (LMO) genes in the developing mouse inner ear.** *Gene Expr Patterns* 2006 **6**:857–863.
  29. Lecoin L, Sii-Felice K, Pouponnot C, Eychene A, Felder-Schmittbuhl M-P: **Comparison of *maf* gene expression patterns during chick embryo development.** *Gene Expr Patterns* 2004 **4** 35–46.
  30. Sanchez-Guardado LO, Ferran JL, Rodriguez-Gallardo L, Puelles L, Hidalgo-Sanchez M: ***Meis* gene expression patterns in the developing chicken inner ear.** *J Comp Neurol* 2011, **519**:125–147.

31. Rinkwitz-Brandt S, Justus M, Oldenettel I, Arnold HH, Bober E: **Distinct temporal expression of mouse *Nkx-5.1* and *Nkx-5.2* homeobox genes during brain and ear development.** *Mech Dev* 1995, **52**:371–381.
32. Hadrys T, Braun T, Rinkwitz-Brandt S, Arnold HH, Bober E: ***Nkx5-1* controls semicircular canal formation in the mouse inner ear.** *Development* 1998, **125**:33–39.
33. Wang WD, Lufkin T: ***Hmx* homeobox gene function in inner ear and nervous system cell-type specification and development.** *Exp Cell Res* 2005, **306**:373–379.
34. Tang LS, Alger HM, Lin F, Pereira FA: **Dynamic expression of COUP-TFI and COUP-TFII during development and functional maturation of the mouse inner ear.** *Gene Expr Patterns* 2005, **5**:587–592.
35. Tang LS, Alger HM, Pereira FA: **COUP-TFI controls Notch regulation of hair cell and support cell differentiation.** *Development* 2006, **133**:3683–3693.
36. Burton Q, Cole LK, Mulheisen M, Chang W, Wu DK: **The role of *Pax2* in mouse inner ear development.** *Dev Biol* 2004, **272**:161–175.
37. Bouchard M, de Caprona D, Busslinger M, Xu P, Fritzsche B: ***Pax2* and *Pax8* cooperate in mouse inner ear morphogenesis and innervation.** *BMC Dev Biol* 2010, **10**:89.
38. Baldwin C, Hoth C, Macina R, Milunsky A: **Mutations in *PAX3* that cause Waardenburg syndrome type 1: Ten new mutations and review of the literature.** *Am J Med Genet* 2005, **58**:115–122.
39. Bondurand N, Pingault V, Goerich DE, Lemort N, Sock E, Le Caignec C, Wegner M, Goossens M: **Interaction between *SOX10*, *PAX3* and *MITF*, three genes altered in Waardenburg syndrome.** *Am J Hum Genet* 2000, **67**:1907–1917.
40. Bouchard M, Pfeiffer P, Busslinger M: **Functional equivalence of the transcription factors *Pax2* and *Pax5* in mouse development.** *Development* 2000, **127**:3703–3713.
41. Murdoch B, DelConte C, García-Castro MI: ***Pax7* lineage contributions to the mammalian neural crest.** *PLoS ONE* 2012, **7**:e41089.
42. Mutai H, Nagashima R, Sugitani Y, Noda T, Fujii M, Matsunaga T: **Expression of *Pou3f3/Brn-1* and its genomic methylation in developing auditory epithelium.** *Dev Neurobiol* 2009, **69**:913–930.
43. Parrish M, Ott T, Lance-Jones C, Schuetz G, Schwaeger-Nickolenko A, Monaghan AP: **Loss of the *Sall3* gene leads to palate deficiency, abnormalities in cranial nerves, and perinatal lethality** *Mol Cell Biol* 2004, **24**:7102–7112
44. Liu W, Li G, Chien JS, S. R, Zhang H, Chiang C, Frenz DA: **Sonic Hedgehog regulates otic capsule chondrogenesis and inner ear development in the mouse embryo.** *Dev Biol* 2002, **248**:240–250.
45. Clement-Jones M, Schiller S, Rao E, Blaschke RJ, Zuniga A, Zeller R, Robson SC, Binder G, Glass I, Strachan T, Lindsay S, Rappold GA: **The short stature homeobox gene *SHOX* is involved in skeletal abnormalities in Turner syndrome.** *Hum Mol Genet* 2000, **9**:695–702.
46. Kiernan AE, Pelling AL, Leung KKH, Tang ASP, Bell DM, Tease C, Lovell-Badge R, Steel KP, Cheah KSE: ***Sox2* is required for sensory organ development in the mammalian inner ear.** *Nature* 2005, **434**:1031–1035.
47. Neves J, Kamaid A, Alsina B, Giraldez F: **Differential expression of *Sox2* and *Sox3* in neuronal and sensory progenitors of the developing inner ear of the chick.** *J Comp Neurol* 2007, **503**:487–500.
48. Murakami A, Ishida S, Thurlow J, Revest J-M, Dickson C: **SOX6 binds CtBP2 to repress transcription from the *Fgf-3* promoter.** *Nucleic Acids Res* 2001, **29**:3347–3355.

49. Hosoya M, Fujioka M, Matsuda S, Ohba H, Shibata S, Nakagawa F, Watabe T, Wakabayashi K-I, Saga Y, Ogawa K, Okano HJ, Okano H: **Expression and function of Sox21 during mouse cochlea development.** *Neurochem Res* 2011, **36**:1261–1269.
50. Tekin M, Sirmaci A, Yüksel-Konuk B, Fitoz S, Sennaroğlu L: **A complex TFAP2A allele is associated with branchio-oculo-facial syndrome and inner ear malformation in a deaf child.** *Am J Med Genet A* 2009, **149A**:427–430.
51. Coré N, Caubita X, Metchata A, Bonedb A, Djabalib M, Fasanola L: **Tshz1 is required for axial skeleton, soft palate and middle ear development in mice** *Dev Biol* 2007, **308**:407–420.
52. Warner SJ, Hutson MR, Oh S-H, Gerlach-Bank LM, Lomax MI, Barald KF: **Expression of ZIC genes in the development of the chick inner ear and nervous system.** *Dev Dyn* 2003, **226**:702–712.
53. **The Hereditary Hearing loss Homepage** [<http://hereditaryhearingloss.org>]
54. Ficker M, Powles N, Warr N, Pirvola U, Maconochie M: **Analysis of genes from inner ear developmental-stage cDNA subtraction reveals molecular regionalization of the otic capsule.** *Dev Biol* 2004, **268**:7–23.
55. Chonko KT, Jahan I, Stone J, Wright MC, Fujiyama T, Hoshino M, Fritzsche B, Maricich SM: **Atoh1 directs hair cell differentiation and survival in the late embryonic mouse inner ear.** *Dev Biol* 2013, **381**:401–410.
56. Fekete DM: **Development of the vertebrate ear: insights from knockouts and mutants.** *Trends Neurosci* 1999, **22**:263–269.
57. Blauwkamp MN, Beyer LA, Kabara L, Takemura K, Buck T, King WM, Dolan DF, Barald KF, Raphael Y, Koenig RJ: **The role of bone morphogenetic protein 4 in inner ear development and function.** *Hear Res* 2007, **225**:71–79.
58. Ng L, Goodyear RJ, Woods CA, Schneider MJ, Diamond E, Richardson GP, Kelley MW, Germain DL, Galton VA, Forrest D: **Hearing loss and retarded cochlear development in mice lacking type 2 iodothyronine deiodinase.** *Proc Natl Acad Sci U S A* 2004, **101**:3474–3479.
59. Seim I, Fang X, Xiong Z, Lobanov AV, Huang Z, Ma S, Feng Y, Turanov AA, Zhu Y, Lenz TL, Gerashchenko MV, Fan D, Yim SH, Yao X, Jordan D, Xiong Y, Ma Y, Lyapunov AN, Chen G, Kulakova OI, Sun Y, Lee S-G, Bronson RT, Moskalev AA, Sunyaev SR, Zhang G, Krogh A, Wang J, Gladyshev VN: **Genome analysis reveals insights into the evolution, physiology, and longevity of the Brandt's bat.** *Nat Commun* 2013, **4**:2212.
60. Xiao S, Yu C, Chou X, Yuan W, Wang Y, Bu L, Fu G, Qian M, Yang J, Shi Y, Hu L, Han B, Wang Z, Huang W, Liu J, Chen Z, Zhao G, Kong X: **Dentinogenesis imperfecta 1 with or without progressive hearing loss is associated with distinct mutations in DSPP.** *Nat Genet* 2001, **27**:201–204.
61. Vljakovic SM, Housley GD, Thorne PR, Gupta R, Enjyoji K, Cowan PJ, Liberman MC, Robson SC: **Preservation of cochlear function in Cd39 deficient mice.** *Hear Res* 2009, **253**:77–82.
62. Torres M, Giráldez F: **The development of the vertebrate inner ear.** *Mech Dev* 1998, **71**:5–21.
63. Calvert JA, Dedos SG, Hawker K, Fleming M, Lewis MA, Steel KP: **A missense mutation in Fgfr1 causes ear and skull defects in hush puppy mice.** *Mamm Genome* 2011, **22**:290–305.
64. Seppala M, Depew MJ, Martinelli DC, Fan C-M, Sharpe PT, Cobourne MT: **Gas1 is a modifier for holoprosencephaly and genetically interacts with sonic hedgehog.** *J Clin Invest* 2007, **117**:1575–1584.
65. Sand PG, Langguth B, Itzhacki J, Bauer A, Geis S, Cárdenas-Conejo ZE, Pimentel V, Kleinjung T: **Resequencing of the auxiliary GABA(B) receptor subunit gene KCTD12 in chronic tinnitus.** *Front Syst Neurosci* 2012, **6**:41.

66. Siddiqui S, Zenteno JC, Rice A, Chacón-Camacho O, Naylor SG, Rivera-de la Parra D, Spokes DM, James N, Toomes C, Inglehearn CF, Ali M: **Congenital hereditary endothelial dystrophy caused by *SLC4A11* mutations progresses to Harboyan syndrome.** *Cornea* 2014, **33**:247–251.
67. Zadro C, Alemanno MS, Bellacchio E, Ficarella R, Donaudy F, Melchionda S, Zelante L, Rabionet R, Hilgert N, Estivill X, Van Camp G, Gasparini P, Carella M: **Are *MYO1C* and *MYO1F* associated with hearing loss?** *Biochim Biophys Acta* 2009, **1792**:27–32.
68. Flaherty JP, Fairfield HE, Spruce CA, McCarty CM, Bergstrom DE: **Molecular characterization of an allelic series of mutations in the mouse *Nox3* gene.** *Mamm Genome* 2011, **22**:156–169.
69. Jin DX, Lin Z, Lei D, Jianxin B: **The role of glucocorticoids for spiral ganglion neuron survival.** *Brain Res* 2009, **1277**:3–11.
70. Leruez S, Milea D, Defoort-Dhellemmes S, Colin E, Crochet M, Procaccio V, Ferré M, Lamblin J, Drouin V, Vincent-Delorme C, Lenaers G, Hamel C, Blanchet C, Juul G, Larsen M, Verny C, Reynier P, Amati-Bonneau P, Bonneau D: **Sensorineural hearing loss in *OPA1*-linked disorders.** *Brain* 2013, **136**:e236.
71. Liang Y, Shen D, Cai W: **Two coding single nucleotide polymorphisms in the *SALL1* gene in Townes-Brocks syndrome: a case report and review of the literature.** *Journal of Pediatric Surgery* 2008, **43**:391–393.
72. Shim K, Minowada G, Coling DE, Martin GR: ***Sprouty2*, a mouse deafness gene, regulates cell fate decisions in the auditory sensory epithelium by antagonizing FGF signaling.** *Dev Cell* 2005, **8**:553–564.
73. Vitelli F, Viola A, Morishima M, Pramparo T, Baldini A, Lindsay E: ***TBX1* is required for inner ear morphogenesis.** *Hum Mol Genet* 2003, **12**:2041–2048.
74. Corey DP, García-Añoveros J, Holt JR, Kwan KY, Lin S-Y, Vollrath MA, Amalfitano A, Cheung EL-M, Derfler BH, Duggan A, Géléoc GSG, Gray PA, Hoffman MP, Rehm HL, Tamasauskas D, Zhang D-S: ***TRPA1* is a candidate for the mechanosensitive transduction channel of vertebrate hair cells.** *Nature* 2004, **432**:723–730.
75. Zhang Y, Blackwell EL, McKnight MT, Knutsen GR, Vu WT, Ruest LB: **Specific inactivation of *Twist1* in the mandibular arch neural crest cells affects the development of the ramus and reveals interactions with *hand2*.** *Dev Dyn* 2012, **241**:924–940.
