# Supplementary material for: Divergent evolutionary rates in vertebrate and mammalian specific conserved non-coding elements (CNEs) in echolocating mammals
Source: PubMed Central journal article supplement (PMC4302572; doi:10.1186/s12862-014-0261-5), 2014-12-19

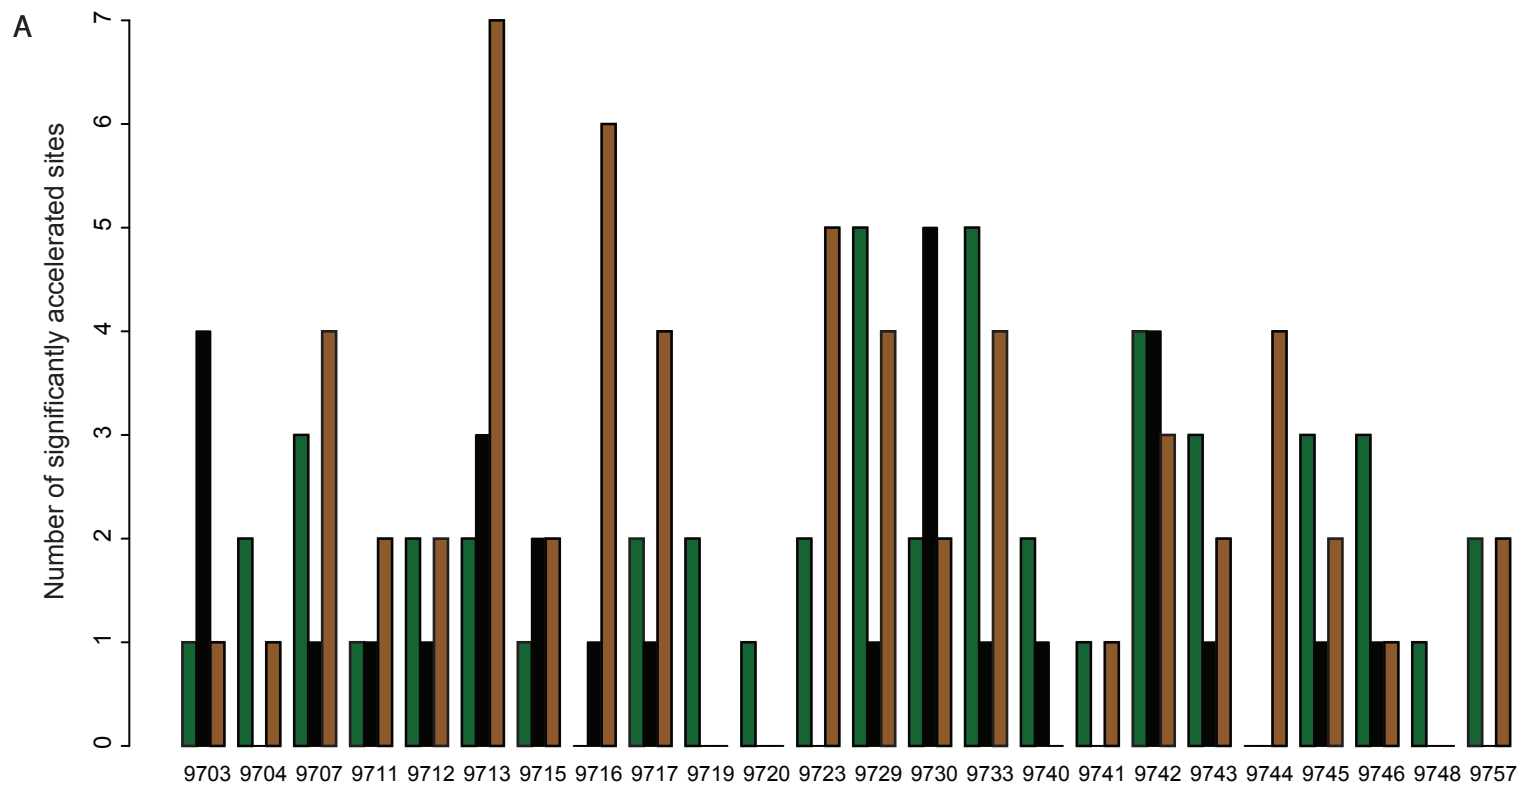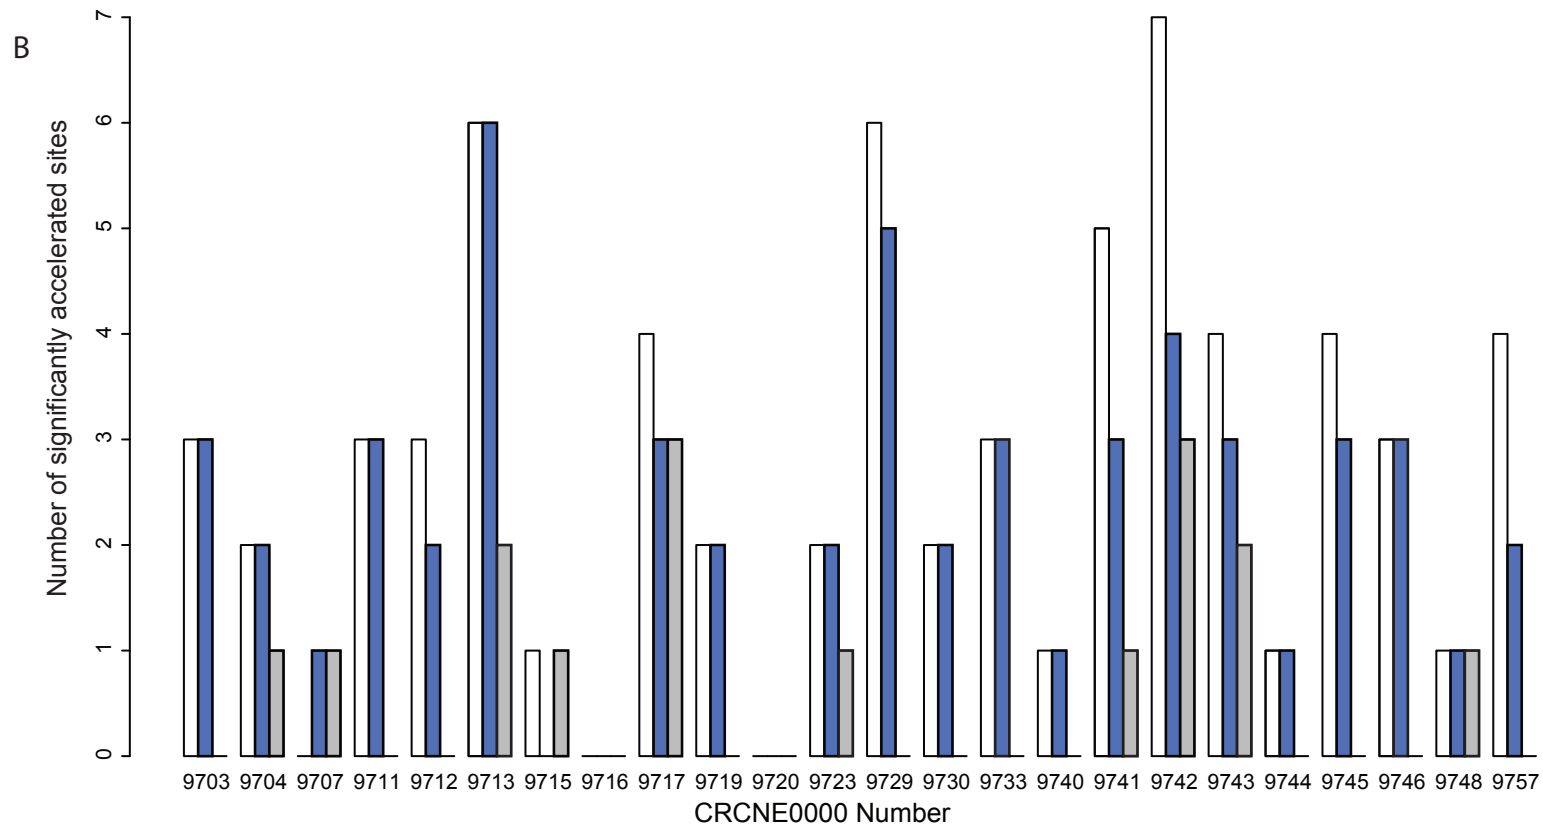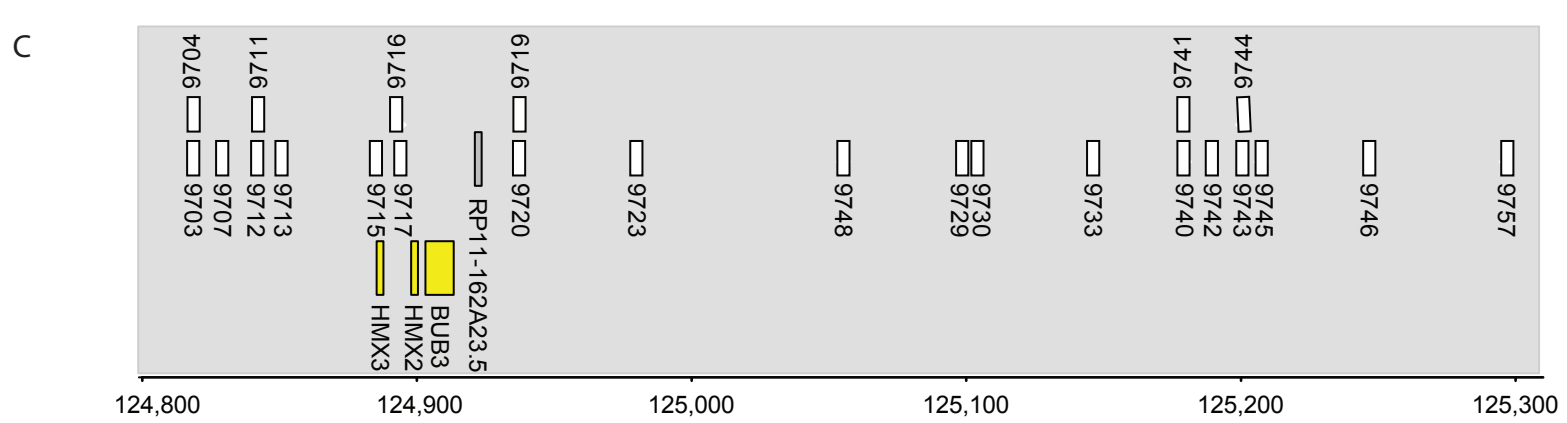

Supplement: 12862_2014_261_MOESM8_ESM.pdf [file 12862_2014_261_MOESM8_ESM.pdf]
